# Supplementary material for: The CD73 immune checkpoint promotes tumor cell metabolic fitness
Source: eLife journal article supplement (doi:10.7554/elife.84508), 2023-06-01
Supplement: fig1-data2 [file SITA_GLC_2018.xlsx]

## Sheet: Scan data
Sample name				Pyruvic (174,115)	Pyruvic M+1	Pyruvic M+2	Pyruvic M+3	Lactic (261,233)	Lactic M+1	Lactic M+2	Lactic M+3	Alanine (260,232)	Alanine m+1	Alanine m+2	Alanine m+3	Glycine (246,218)	Glycine m+1	Glycine m+2	Sarcosine (260,232)	Sarcosine M+1	Sarcosine M+2	Sarcosine M+3	Valine (302,196)	Valine M+1	Valine M+2	Valine M+3	Valine M+4	Valine M+5	Valine M+6	Leucine (302,274)	Leucine M+1	Leucine M+2	Leucine M+3	Leucine M+4	Leucine M+5	Leucine M+6	Leucine M+7	Isoleucine (302,274)	Isoleucine M+1	Isoleucine M+2	Isoleucine M+3	Isoleucine M+4	Isoleucine M+5	Isoleucine M+6	Isoleucine M+7	Succinic (289,331)	Succinic +1	Succinic +2	Succinic +3
MDA CD73neg A	MDA_CD73NEG_A_270818_01.D	Sample	2018-08-27 18:29:11	11208.2	1741.52	6458.87	155311	91018.4	25003.3	64685.2	1.48464e+06	93318.6	23398.8	17138.9	204008	2.30596e+06	500873	295767	197.309	0	84.03	0	287021	74929.1	27647.5	4701.02	522.795	86.648		1.026e+06	272785	103007	17805.4	3611.2	283.766	0		1.15855e+06	307436	117059	19890.8	3488.06	334.444			12114.1	5469.82	12297.7	6275.33
MDA CD73neg B	MDA_CD73NEG_B_270818_01.D	Sample	2018-08-27 15:40:19	8920.34	1435.52	4475.19	99793.5	78537.2	22870	63248.8	1.47795e+06	102244	23949.1	18963.5	217289	2.55847e+06	565626	329679	173.566	0		0	284533	76874.6	29736.6	5268.02	902.909		0	1.0107e+06	270070	103512	17198.4	2927.07	324.133			1.14887e+06	298383	117217	21535.5	3605.55	239.955			14153.4	5999.38	16919.5	8453.99
MDA CD73neg C	MDA_CD73NEG_C_270818_01.D	Sample	2018-08-27 16:22:31	13887.2	2246.48	7663.38	193612	101481	29581.2	76236.3	1.82823e+06	138004	32170.7	25259.3	293526	3.41628e+06	744719	435810	248.825	0		0	383602	98765	37383.4	6811.49	908.31	121.524	0	1.28243e+06	339144	130494	22867.4	3703.4	570.434	56.398		1.49941e+06	395391	150057	25038.2	4867.49	479.824			13918.1	5017.47	14978.7	7056.96
MDA CD73pos A	MDA_CD73POS_A_270818_01.D	Sample	2018-08-27 14:58:10	12272.7	1991.84	2447.62	39277.6	78746.8	22273.5	56995.5	1.29728e+06	110921	27479.9	18848	179646	2.64438e+06	578928	314172	70.09	0		0	291947	76791.4	29094.2	4804.81	730.466		0	1.04101e+06	274733	106687	18384.5	3283.91	333.607			1.18128e+06	309965	120551	20557.4	3727.73	331.494			16331.5	6109.99	18188.3	8745.34
MDA CD73pos B	MDA_CD73POS_B_270818_01.D	Sample	2018-08-27 19:14:33	13143.2	2170.97	5110.21	106393	96187.5	27358.9	71591.7	1.62863e+06	138902	33886.1	24330	226248	3.83398e+06	837450	461188	290.647	0		0	351115	90307.7	34464.5	5861.17	908.153	41.728		1.25612e+06	329286	126685	21201.5	3841.78	241.625		0	1.38276e+06	363263	137588	23875.6	4428.68	482.423			15873.7	5286.72	18131.3	7737.42
MDA CD73pos C	MDA_CD73POS_C_270818_01.D	Sample	2018-08-27 17:46:58	13825.8	2007.38	3985.56	81681.4	97079.5	26143.7	65887.9	1.52742e+06	128409	31708.8	23497.6	211605	3.27352e+06	707796	384859	226.489	97.716		0	352227	92992.9	36829.4	6307.36	1085.19	104.56		1.24781e+06	325666	126482	22066.5	3735.06	592.947			1.38891e+06	363421	140459	23459.4	3966.52	239.808			15523.2	5148.63	17426.3	7931.65
MDA CD73neg A, 1:10 dilution	MDA_CD73NEG_A_270818_03DIL.D	Sample	2018-08-28 05:43:49	1353.51	256.416	343.604	13319.1	10627.2	2975.35	4052.25	86243.7	6256.39	1251.17	1354.03	12806.7	142285	31586.4	18069					15986	4130.96	1430.53	128.704		0		52421.2	14137.1	5481.04	969.417	63.896				60742.5	16949.3	6485.72	575.154	32.6				988.149	478.851	911.695	437.495
MDA CD73neg B, 1:10 dilution	MDA_CD73NEG_B_270818_03DIL.D	Sample	2018-08-28 02:55:18	1417.99	150.658	493.983	8649.57	11327	3328.5	4213.64	95226.4	6788.81	1720.17	1202.66	15416.2	173476	38245.4	23259.1	0				17578.5	4689.39	1903.27	106.852				58294.2	15723.4	5547.93	1279.4	53.7075				66305	17920.6	7214.76	1179.02					1774.49	718.187	1227.17	604.4
MDA CD73neg C, 1:10 dilution	MDA_CD73NEG_C_270818_03DIL.D	Sample	2018-08-28 03:37:24	1618.16	55.335	766.677	17747.2	12870.6	2808.72	5257.32	118064	10268.6	2128.61	1512.16	20674.5	239944	50574.7	30165.8		0			23093.9	6241.02	2350.17	218.52				74044.5	19382.5	7951.82	1279.9	117.94				87145	22905.5	8817.79	1405.6	168.671				1619.46	730.36	832.325	522.32
MDA CD73pos A, 1:10 dilution	MDA_CD73POS_A_270818_03DIL.D	Sample	2018-08-28 02:13:00	1956.47	308.71	217.706	5249.33	14083.1	4016.17	5050.77	104578	9891.95	2248.13	1199.49	14884.5	224955	47654.4	26704.5	0	0			20610.4	5712.7	2359.85	182.28		0		70158.7	18331.1	7609.42	1233.87	129.646			0	81528.8	20827.7	9100.37	1342.45	120.534				1853.25	641.603	1759.4	623.311
MDA CD73pos B, 1:10 dilution	MDA_CD73POS_B_270818_03DIL.D	Sample	2018-08-28 06:25:55	1736.99	238.101	348.912	8704.24	13029.7	3175.72	4529.27	94188.4	8784.1	2167.53	1340.51	13828.3	233207	52433.4	29199	0	0		0	19280.4	5601.88	2046.74	187.297				61669.5	17260.4	6493.15	1041.22	117.897				69998.9	18488.1	6551.02	1189.8	236.563				1501.67	357.59	934.039	409.478
MDA CD73pos C, 1:10 dilution	MDA_CD73POS_C_270818_03DIL.D	Sample	2018-08-28 05:01:39	1443.02	207.584	359.799	7762.34	13788.5	3068.98	5473.68	91774.6	8350.86	2042.33	1507.14	14233.1	208452	44419.4	24308.6	0				19344.9	5004.46	1782.12	219.785			0	61939.7	17827.3	6805.76	1124.64					71033.7	17849.3	7108.51	1179.5					1750.64	362.525	1068.86	426.694
MTBSTFA + Mox	BLANK_270818_01.D	Blank	2018-08-27 14:16:03	251.074				7120.86	1748.02	678.3				0	0	387.857														170.632																93.1455
MTBSTFA + Mox	BLANK_270818_02.D	Blank	2018-08-27 17:04:47	426.353	0	0	0	10700.7	2256	970.882	77.7945	116.928	0	0	0	473.277	303.487												0	175.822								0								43.684
Saturating signal
Near saturation
Signal in good range
Ambiguous or close to limit of detection
Below limit of detection
Bad peak shape (quantifier and/or qualifiers), due to coelution or low counts.
Unconfirmed [lack of scan data or unclear scan data]
Widened peak shape
Interference
No SIM data collected
[truncated: 264 more columns]

## Sheet: Valine 288 scan
Sample name				Valine 288 (288,302)	Valine 288 M+1	Valine 288 M+2	Valine 288 M+3	Valine 288 M+4	Valine 288 M+5	Valine 288 M+6
MDA CD73neg A	MDA_CD73NEG_A_270818_01.D	Sample	2018-08-27 18:29:11	588590	152814	61211.9	11008.4	2464.82	6654.83	1723.95
MDA CD73neg B	MDA_CD73NEG_B_270818_01.D	Sample	2018-08-27 15:40:19	602855	152090	60907.1	11139.8	2190.74	7561.2	1491.53
MDA CD73neg C	MDA_CD73NEG_C_270818_01.D	Sample	2018-08-27 16:22:31	778882	199430	80308.5	15044.4	3020.47	8216.02	1915.83
MDA CD73pos A	MDA_CD73POS_A_270818_01.D	Sample	2018-08-27 14:58:10	604514	153159	63686.5	10586	2383.29	7698.91	1381.44
MDA CD73pos B	MDA_CD73POS_B_270818_01.D	Sample	2018-08-27 19:14:33	722160	183413	77113.7	14033	2638.5	9348.1	1906.65
MDA CD73pos C	MDA_CD73POS_C_270818_01.D	Sample	2018-08-27 17:46:58	722317	183213	75686.6	12691.8	2883.61	9023.93	1754.24
MDA CD73neg A, 1:10 dilution	MDA_CD73NEG_A_270818_03DIL.D	Sample	2018-08-28 05:43:49	33616.5	8573.71	3453.85	618.376	67.704	305.22
MDA CD73neg B, 1:10 dilution	MDA_CD73NEG_B_270818_03DIL.D	Sample	2018-08-28 02:55:18	37686.6	9962.94	3890.2	366.46		499.326
MDA CD73neg C, 1:10 dilution	MDA_CD73NEG_C_270818_03DIL.D	Sample	2018-08-28 03:37:24	47596.4	11647.5	5512.65	780.766	147.191	500.156
MDA CD73pos A, 1:10 dilution	MDA_CD73POS_A_270818_03DIL.D	Sample	2018-08-28 02:13:00	44343.4	11465.1	5070.71	927.699		560.448
MDA CD73pos B, 1:10 dilution	MDA_CD73POS_B_270818_03DIL.D	Sample	2018-08-28 06:25:55	38142.8	10266.8	4415.93	441.384	80.132	406.732
MDA CD73pos C, 1:10 dilution	MDA_CD73POS_C_270818_03DIL.D	Sample	2018-08-28 05:01:39	40972.4	10360	3985.79	799.826	77.1435	403.497
MTBSTFA + Mox	BLANK_270818_01.D	Blank	2018-08-27 14:16:03	0
MTBSTFA + Mox	BLANK_270818_02.D	Blank	2018-08-27 17:04:47	0

## Sheet: SIM data
				Pyruvic (174,115)	Pyruvic M+1	Pyruvic M+2	Pyruvic M+3	Lactic (261,233)	Lactic M+1	Lactic M+2	Lactic M+3	Alanine (260,232)	Alanine m+1	Alanine m+2	Alanine m+3	Glycine (246,218)	Glycine m+1	Glycine m+2	Sarcosine (260,232)	Sarcosine M+1	Sarcosine M+2	Sarcosine M+3	Valine (302,196)	Valine M+1	Valine M+2	Valine M+3	Valine M+4	Valine M+5	Valine M+6	Leucine (302,274)	Leucine M+1	Leucine M+2	Leucine M+3	Leucine M+4	Leucine M+5	Leucine M+6	Leucine M+7	Isoleucine (302,274)	Isoleucine M+1	Isoleucine M+2	Isoleucine M+3	Isoleucine M+4	Isoleucine M+5	Isoleucine M+6	Isoleucine M+7	Succinic (289,331)	Succinic +1	Succinic +2	Succinic +3
MDA CD73neg A	MDA_CD73NEG_A_270818_02SIM.D	Sample	2018-08-28 00:07:01	38148.3	5738.89	20938.2	504904	257578	71942.1	183637	4.27484e+06	318856	77348	60556.4	707081	6.61821e+06	1.518e+06	871688	1088.29	236.47	570.227	422.978	925906	244556	94146	16067	2801	448.496	71.877	3.31775e+06	888850	343495	58914.2	10287.4	1302.62	180.507	558.661	3.75717e+06	1.00276e+06	388100	66297.3	11374.5	1345.86	126.866	84.5053	180208	66434.5	175939	20694.8
MDA CD73neg B	MDA_CD73NEG_B_270818_02SIM.D	Sample	2018-08-27 21:19:58	33150.6	4888.57	14659.2	351344	251395	71703.8	198695	4.7051e+06	384422	93354	73703.8	856993	8.13039e+06	1.89211e+06	1.07423e+06	1243.82	311.435	739.001	402.09	1.06955e+06	282183	108326	18514.1	3170.82	462.421	63.1104	3.71359e+06	992800	384264	66448.4	11410.8	1476.78	157.903	463.924	4.23633e+06	1.13191e+06	438703	74785.8	12955.7	1499.09	136.382	56.205	244643	89612.1	263851	30352.8
MDA CD73neg C	MDA_CD73NEG_C_270818_02SIM.D	Sample	2018-08-27 22:01:42	49723.2	7545.79	27400.8	673439	296762	84355.4	231277	5.43051e+06	476359	116302	91600.2	1.07194e+06	9.69527e+06	2.29229e+06	1.29356e+06	1234.21	320.126	793.679	456.995	1.3195e+06	348182	134337	22954.1	3971.13	593.735	72.1931	4.45147e+06	1.19522e+06	461361	79295.5	13732.3	1684.15	180.858	212.919	5.11352e+06	1.37059e+06	532318	91038.8	15461.6	1886.4	201.86	67.3645	211167	78624.9	216660	25605
MDA CD73pos A	MDA_CD73POS_A_270818_02SIM.D	Sample	2018-08-27 20:38:08	50430.5	7006.66	9171.81	164467	282585	79299.7	203389	4.61177e+06	461412	112126	82744.8	766674	9.14532e+06	2.15671e+06	1.12866e+06	1547.21	377.849	798.417	490.577	1.19984e+06	316131	121917	20737.1	3522.96	475.993	58.4809	4.19553e+06	1.12472e+06	435853	74808.9	12907.4	1573.12	178.866	554.414	4.66861e+06	1.24659e+06	483534	82969.6	14373.4	1735.41	179.496	30.6193	284810	96997.7	313446	38033.5
MDA CD73pos B	MDA_CD73POS_B_270818_02SIM.D	Sample	2018-08-28 00:48:45	47377.8	6442.1	15987.3	342891	272172	76848.1	203233	4.61818e+06	456620	110812	82270.9	770688	1.03907e+07	2.48393e+06	1.28937e+06	1564.8	431.078	718.714	256.364	1.15379e+06	304924	117162	19965.5	3401.08	546.747	1052.17	4.01585e+06	1.07647e+06	415129	71785.1	12354.3	1520.02	193.243	640.707	4.47359e+06	1.19529e+06	462813	79715.3	13539.4	1691.63	196.451	49.0653	227674	77569.2	246531	29323.5
MDA CD73pos C	MDA_CD73POS_C_270818_02SIM.D	Sample	2018-08-27 23:25:13	48436.4	6562.36	13731.1	281153	287040	80252.6	203794	4.60154e+06	457687	111705	83294.8	775539	9.26075e+06	2.20236e+06	1.14258e+06	1547.76	336.244	764.415	477.974	1.20485e+06	318006	122650	20891.2	3580.57	520.134	61.7779	4.18609e+06	1.12233e+06	433828	75150.6	13060	1578.41	208.346	380.423	4.68366e+06	1.25434e+06	485465	83349.3	14268.3	1682.2	177.917	37.1465	238202	81920.4	264176	31931.2
MTBSTFA + Mox	BLANK_270818_03SIM.D	Blank	2018-08-27 19:56:22	1978.28	198.391	0	0	37680.9	8423.61	3699.49	715.471	628.63	0	0	0	2758.14	619.199	269.21	80.584	8.96985	27.8399	44.1013	128.761	32.5885	253.517	63.7302	25.9367	608.878	6.26913	1708.58	418.828	188.953	90.0086	20.1712	7.44288		413.886	1144.48	303.633	101.96	38.8348	8.98623	15.3298			4535.21	1057.66	537.917	59.7777
MTBSTFA + Mox	BLANK_270818_04SIM.D	Blank	2018-08-27 22:43:30	2141.36	283.059	0	0	38709.2	8571.68	3799.82	740.38	642.375	0	0	0	3025.16	662.077	302.13	70.8001	20.9016	10.098	42.0696	148.241	37.729	198.865	50.7356	21.4399	729.392	509.046	1732.52	506.412	188.428	85.9713	18.2859			508.428	1352.96	348.605	138.056	29.3364	3.10847	10.0451		8.16538	4171.73	901.162	486.005	28.5225
Saturating signal
Near saturation
Signal in good range
Ambiguous or close to limit of detection
Below limit of detection
Bad peak shape (quantifier and/or qualifiers), due to coelution or low counts.
Unconfirmed [lack of scan data or unclear scan data]
Widened peak shape
Interference
No SIM data collected
Only colour-coded areas
have been verified and used.
[truncated: 264 more columns]

## Sheet: Pyruvic
	MDA CD73neg A	MDA CD73neg B	MDA CD73neg C	MDA CD73pos A	MDA CD73pos B	MDA CD73pos C		Pyruvate
Pyruvic (174,115)	11208.2	8920.34	13887.2	12272.7	13143.2	13825.8		1.17142	0	0	0
Pyruvic M+1	1741.52	1435.52	2246.48	1991.84	2170.97	2007.38		-0.143275	1.17142	0	0
Pyruvic M+2	6458.87	4475.19	7663.38	2447.62	5110.21	3985.56		-0.0357412	-0.143275	1.17142	0
Pyruvic M+3	155311	99793.5	193612	39277.6	106393	81681.4		0.00702558	-0.0357412	-0.143275	1.17142
Sum of all ions	174720	114625	217409	55989.8	126817	101500
Normalization per ion	0.0641498	0.0778222	0.0638761	0.219195	0.103638	0.136214
	0.00996754	0.0125237	0.010333	0.0355751	0.0171189	0.0197771
	0.036967	0.0390422	0.0352487	0.0437155	0.0402958	0.0392666
	0.888916	0.870612	0.890542	0.701514	0.838947	0.804742
matrtix correction	MDA CD73neg A	MDA CD73neg B	MDA CD73neg C	MDA CD73pos A	MDA CD73pos B	MDA CD73pos C
M	0.0751466	0.0911628	0.074826	0.256771	0.121404	0.159565
M+1	0.00248514	0.00352057	0.00295245	0.0102682	0.00520464	0.00365124
M+2	0.0395832	0.0411591	0.0375277	0.0382781	0.0410466	0.0382958
M+3	1.03609	1.01436	1.03823	0.815775	0.977105	0.937318
Matrix sum	1.15331	1.1502	1.15354	1.12109	1.14476	1.13883
SIM DATA
Pyruvic (174,115) Results	38148.3	33150.6	49723.2	50430.5	47377.8	48436.4
Pyruvic M+1 Results	5738.89	4888.57	7545.79	7006.66	6442.1	6562.36
Pyruvic M+2 Results	20938.2	14659.2	27400.8	9171.81	15987.3	13731.1
Pyruvic M+3 Results	504904	351344	673439	164467	342891	281153
Sum of all ions	569729	404043	758109	231076	412698	349883
Normalization per ion	0.0669586	0.0820473	0.0655885	0.218242	0.1148	0.138436
	0.010073	0.0120991	0.00995344	0.0303218	0.0156097	0.0187559
	0.0367511	0.0362812	0.0361436	0.0396917	0.0387385	0.0392448
	0.886217	0.869572	0.888314	0.711745	0.830852	0.803563
matrtix correction	0.0784369	0.0961122	0.0768319	0.255654	0.134479	0.162167
M	0.00220627	0.00241786	0.00226249	0.00425106	0.00183758	0.00213663
M+1	0.0392147	0.0378346	0.0385692	0.0343512	0.0390396	0.0383372
M+2	1.03298	1.01358	1.03552	0.828517	0.967978	0.935992
M+3
Matrix sum	1.15284	1.14995	1.15318	1.12277	1.14333	1.13863
Renormalization	MDA CD73neg A	MDA CD73neg B	MDA CD73neg C	MDA CD73pos A	MDA CD73pos B	MDA CD73pos C
M	0.0680381	0.0835796	0.066626	0.227698	0.11762	0.142423
M+1	0.00191377	0.00210259	0.00196196	0.00378622	0.00160721	0.00187649
M+2	0.0340158	0.0329012	0.0334459	0.030595	0.0341454	0.0336695
M+3	0.896032	0.881417	0.897966	0.73792	0.846627	0.822031

## Sheet: dil Lactate
	MDA CD73neg A, 1:10 dilution	MDA CD73neg B, 1:10 dilution	MDA CD73neg C, 1:10 dilution	MDA CD73pos A, 1:10 dilution	MDA CD73pos B, 1:10 dilution	MDA CD73pos C, 1:10 dilution		MTBSTFA + Mox	MTBSTFA + Mox		Lactate
Lactic (261,233)	10627.2	11327	12870.6	14083.1	13029.7	13788.5		7120.86	10700.7		1.33798	0	0	0
Lactic M+1	2975.35	3328.5	2808.72	4016.17	3175.72	3068.98		1748.02	2256		-0.301609	1.33798	0	0
Lactic M+2	4052.25	4213.64	5257.32	5050.77	4529.27	5473.68		678.3	970.882		-0.0595149	-0.301609	1.33798	0
Lactic M+3	86243.7	95226.4	118064	104578	94188.4	91774.6		0	77.7945		0.0229531	-0.0595149	-0.301609	1.33798
Sum of all ions	103899	114096	139000	127728	114923	114106		9547.18	14005.4
	1.03899e+06	1.14096e+06	1.39e+06	1.27728e+06	1.14923e+06	1.14106e+06
Normalization per ion	0.102285	0.0992767	0.0925941	0.110258	0.113377	0.12084		0.74586	0.764042
	0.0286371	0.0291729	0.0202065	0.0314432	0.0276334	0.0268959		0.183093	0.161081
	0.039002	0.0369308	0.0378223	0.0395432	0.0394114	0.0479702		0.0710472	0.0693221
	0.830076	0.83462	0.849377	0.818755	0.819578	0.804294		0	0.00555461
Matrix Correction
M	0.136855	0.13283	0.123889	0.147523	0.151696	0.161681		0.997944	1.02227
M+1	0.00746584	0.00909001	-0.000891307	0.00881538	0.0027773	-0.000460258		0.020016	-0.0149189
M+2	0.0374591	0.0347054	0.0390002	0.0368624	0.0376494	0.0488793		-0.00455265	-0.00130402
M+3	1.0995	1.10611	1.12596	1.08421	1.08565	1.06283		-0.0152054	-0.00552581
Matrix sum	1.28128	1.28273	1.28796	1.27741	1.27777	1.27293
renormalizedMatrix Correction	MDA CD73neg A, 1:10 dilution	MDA CD73neg B, 1:10 dilution	MDA CD73neg C, 1:10 dilution	MDA CD73pos A, 1:10 dilution	MDA CD73pos B, 1:10 dilution	MDA CD73pos C, 1:10 dilution
M	0.106811	0.103552	0.0961899	0.115486	0.118719	0.127015
M+1	0.00582685	0.00708645	-0.00069203	0.00690098	0.00217355	-0.000361573
M+2	0.0292356	0.0270558	0.0302806	0.0288571	0.0294649	0.0383989
M+3	0.858127	0.862305	0.874222	0.848756	0.849642	0.834948

## Sheet: ala
	MDA CD73neg A	MDA CD73neg B	MDA CD73neg C	MDA CD73pos A	MDA CD73pos B	MDA CD73pos C		MDA CD73neg A, 1:10 dilution	MDA CD73neg B, 1:10 dilution	MDA CD73neg C, 1:10 dilution	MDA CD73pos A, 1:10 dilution	MDA CD73pos B, 1:10 dilution	MDA CD73pos C, 1:10 dilution		MTBSTFA + Mox	MTBSTFA + Mox		Alanine / Sarcosine
Alanine (260,232)	93318.6	102244	138004	110921	138902	128409		6256.39	6788.81	10268.6	9891.95	8784.1	8350.86		0	116.928		1.33986	0	0	0
Alanine m+1	23398.8	23949.1	32170.7	27479.9	33886.1	31708.8		1251.17	1720.17	2128.61	2248.13	2167.53	2042.33		0	0		-0.306672	1.33986	0	0
Alanine m+2	17138.9	18963.5	25259.3	18848	24330	23497.6		1354.03	1202.66	1512.16	1199.49	1340.51	1507.14		0	0		-0.0557821	-0.306672	1.33986	0
Alanine m+3	204008	217289	293526	179646	226248	211605		12806.7	15416.2	20674.5	14884.5	13828.3	14233.1		0	0		0.0225565	-0.0557821	-0.306672	1.33986
Sum of all ions	337864	362446	488960	336895	423366	395221		21668.3	25127.8	34583.9	28224.1	26120.5	26133.4		0	116.928
Normalization per ion	0.276201	0.282094	0.28224	0.329244	0.32809	0.324905		0.288735	0.270171	0.29692	0.350479	0.336292	0.319547			1
	0.0692549	0.0660763	0.065794	0.0815683	0.0800397	0.0802305		0.0577423	0.0684566	0.0615493	0.0796531	0.082982	0.07815			0
	0.0507272	0.052321	0.0516592	0.0559462	0.0574679	0.0594544		0.0624892	0.0478618	0.0437245	0.0424989	0.0513203	0.0576712			0
	0.603816	0.599509	0.600307	0.533241	0.534403	0.53541		0.591033	0.613511	0.597807	0.527369	0.529406	0.544632			0
Matrix Correction
M	0.370071	0.377966	0.378161	0.441141	0.439593	0.435327		0.386864	0.361991	0.39783	0.469592	0.450583	0.428148			1.33986
M+1	0.00808839	0.00202246	0.00159944	0.00831972	0.00662587	0.00785795		-0.0111807	0.00886814	-0.00858968	-0.000758389	0.00805267	0.0067136			-0.306672
M+2	0.0313216	0.0341031	0.0332949	0.0315792	0.0341513	0.036932		0.0499124	0.0280635	0.0231463	0.0129646	0.0245545	0.0354797			-0.0557821
M+3	0.795838	0.789888	0.791179	0.700186	0.701336	0.701993		0.776029	0.809614	0.790831	0.697028	0.696546	0.714891			0.0225565
Matrix sum	1.20532	1.20398	1.20423	1.18123	1.18171	1.18211		1.20162	1.20854	1.20322	1.17883	1.17974	1.18523
SIM data
	MDA CD73neg A	MDA CD73neg B	MDA CD73neg C	MDA CD73pos A	MDA CD73pos B	MDA CD73pos C		MTBSTFA + Mox	MTBSTFA + Mox
Alanine (260,232)	318856	384422	476359	461412	456620	457687		628.63	642.375
Alanine m+1	77348	93354	116302	112126	110812	111705		0	0
Alanine m+2	60556.4	73703.8	91600.2	82744.8	82270.9	83294.8		0	0
Alanine m+3	707081	856993	1.07194e+06	766674	770688	775539		0	0
Sum of all ions	1.16384e+06	1.40847e+06	1.7562e+06	1.42296e+06	1.42039e+06	1.42823e+06
Normalization per ion	0.273968	0.272935	0.271244	0.324263	0.321475	0.320458
	0.0664593	0.0662803	0.0662236	0.0787978	0.0780151	0.0782122
	0.0520315	0.0523289	0.0521582	0.0581499	0.0579213	0.0583205
	0.607541	0.608455	0.610374	0.538789	0.542589	0.543009
Matrix Correction
M	0.367079	0.365695	0.363429	0.434466	0.43073	0.429368
M+1	0.00502746	0.00510447	0.00554708	0.00613533	0.00594173	0.00651755
M+2	0.0340511	0.034562	0.034445	0.0356594	0.0357487	0.0362798
M+3	0.800534	0.801655	0.804243	0.706987	0.712128	0.712535
Matrix sum	1.20669	1.20702	1.20766	1.18325	1.18455	1.1847
Matrix Correction -renormalized	MDA CD73neg A	MDA CD73neg B	MDA CD73neg C	MDA CD73pos A	MDA CD73pos B	MDA CD73pos C
M	0.304203	0.302974	0.300935	0.367181	0.363624	0.362428
M+1	0.00416632	0.004229	0.00459323	0.00518516	0.00501602	0.00550143
M+2	0.0282186	0.0286343	0.028522	0.0301369	0.0301792	0.0306236
M+3	0.663412	0.664163	0.665949	0.597497	0.601181	0.601447

## Sheet: glycine
	MDA CD73neg A	MDA CD73neg B	MDA CD73neg C	MDA CD73pos A	MDA CD73pos B	MDA CD73pos C		MDA CD73neg A, 1:10 dilution	MDA CD73neg B, 1:10 dilution	MDA CD73neg C, 1:10 dilution	MDA CD73pos A, 1:10 dilution	MDA CD73pos B, 1:10 dilution	MDA CD73pos C, 1:10 dilution		MTBSTFA + Mox	MTBSTFA + Mox
Glycine (246,218)	2.30596e+06	2.55847e+06	3.41628e+06	2.64438e+06	3.83398e+06	3.27352e+06		142285	173476	239944	224955	233207	208452		387.857	473.277
Glycine m+1	500873	565626	744719	578928	837450	707796		31586.4	38245.4	50574.7	47654.4	52433.4	44419.4			303.487
Glycine m+2	295767	329679	435810	314172	461188	384859		18069	23259.1	30165.8	26704.5	29199	24308.6
Sum of all ions	3.1026e+06	3.45378e+06	4.59681e+06	3.53748e+06	5.13262e+06	4.36617e+06		191940	234981	320684	299314	314839	277180		387.857	776.764
Normalization per ion	0.743235	0.740775	0.743185	0.747532	0.746984	0.749745		0.741298	0.738257	0.748224	0.751569	0.740717	0.752046		1	0.609293
	0.161436	0.16377	0.162008	0.163656	0.163162	0.162109		0.164564	0.16276	0.157709	0.159212	0.16654	0.160255			0.390707
	0.0953286	0.0954545	0.094807	0.0888123	0.0898543	0.0881456		0.0941385	0.0989832	0.094067	0.089219	0.0927425	0.0876998
Matrix Correction								MDA CD73neg A, 1:10 dilution	MDA CD73neg B, 1:10 dilution	MDA CD73neg C, 1:10 dilution	MDA CD73pos A, 1:10 dilution	MDA CD73pos B, 1:10 dilution	MDA CD73pos C, 1:10 dilution
M	0.984878	0.981618	0.984812	0.990572	0.989845	0.993505		0.982311	0.978282	0.991489	0.995921	0.981542	0.996553
M+1	-0.000552127	0.00325043	0.000219185	0.00114859	0.000653024	-0.00153969		0.00415124	0.00263781	-0.00693162	-0.00590438	0.00693758	-0.00466065
M+2	0.0362306	0.035868	0.0353775	0.0267038	0.028259	0.026137		0.0338645	0.0409829	0.0353425	0.0282887	0.0314783	0.0259468
Matrix sum	1.02056	1.02074	1.02041	1.01842	1.01876	1.0181		1.02033	1.0219	1.0199	1.01831	1.01996	1.01784
Glycine
1.32512	0	0
-0.28857	1.32512	0
-0.0585358	-0.28857	1.32512

## Sheet: Valine 288
	MDA CD73neg A	MDA CD73neg B	MDA CD73neg C	MDA CD73pos A	MDA CD73pos B	MDA CD73pos C		MDA CD73neg A, 1:10 dilution	MDA CD73neg B, 1:10 dilution	MDA CD73neg C, 1:10 dilution	MDA CD73pos A, 1:10 dilution	MDA CD73pos B, 1:10 dilution	MDA CD73pos C, 1:10 dilution		MTBSTFA + Mox	MTBSTFA + Mox
Valine 288 (288,302)	588590	602855	778882	604514	722160	722317		33616.5	37686.6	47596.4	44343.4	38142.8	40972.4		0	0
Valine 288 M+1	152814	152090	199430	153159	183413	183213		8573.71	9962.94	11647.5	11465.1	10266.8	10360
Valine 288 M+2	61211.9	60907.1	80308.5	63686.5	77113.7	75686.6		3453.85	3890.2	5512.65	5070.71	4415.93	3985.79
Valine 288 M+3	11008.4	11139.8	15044.4	10586	14033	12691.8		618.376	366.46	780.766	927.699	441.384	799.826
Valine 288 M+4	2464.82	2190.74	3020.47	2383.29	2638.5	2883.61		67.704	0	147.191	0	80.132	77.1435
Valine 288 M+5	6654.83	7561.2	8216.02	7698.91	9348.1	9023.93		305.22	499.326	500.156	560.448	406.732	403.497
Valine 288 M+6	1723.95	1491.53	1915.83	1381.44	1906.65	1754.24		0	0	0	0	0	0
Sum of all ions	824468	838236	1.08682e+06	843409	1.01061e+06	1.00757e+06		46635.3	52405.6	66184.7	62367.4	53753.8	56598.6
Normalization per ion	0.713903	0.719196	0.716663	0.716751	0.714577	0.71689		0.720837	0.719134	0.719146	0.711003	0.709584	0.723912
	0.185349	0.18144	0.183499	0.181595	0.181487	0.181837		0.183846	0.190112	0.175985	0.183832	0.190997	0.183043
	0.0742442	0.0726611	0.0738934	0.0755108	0.0763039	0.0751179		0.0740608	0.0742326	0.083292	0.0813039	0.082151	0.070422
	0.0133521	0.0132896	0.0138426	0.0125515	0.0138857	0.0125964		0.0132598	0.00699277	0.0117968	0.0148747	0.0082112	0.0141316
	0.00298959	0.00261352	0.00277919	0.00282578	0.00261079	0.00286195		0.00145177	0	0.00222394	0	0.00149072	0.00136299
	0.00807167	0.00902037	0.00755971	0.00912832	0.00924993	0.00895613		0.00654482	0.00952811	0.00755698	0.00898624	0.00756656	0.0071291
	0.00209099	0.00177937	0.00176279	0.00163793	0.00188663	0.00174106		0	0	0	0	0	0
Matrix Correction	MDA CD73neg A	MDA CD73neg B	MDA CD73neg C	MDA CD73pos A	MDA CD73pos B	MDA CD73pos C
M	0.977917	0.985168	0.981699	0.981819	0.97884	0.982009		0.987416	0.985084	0.985099	0.973946	0.972001	0.991628
M+1	0.00832414	0.0011495	0.00484033	0.00220225	0.00280154	0.00248565		0.0038796	0.0130495	-0.00630661	0.00724291	0.0175466	0.00172169
M+2	0.00256282	0.00147643	0.00258183	0.00544807	0.00667945	0.00481974		0.00248512	0.000649113	0.017918	0.0128989	0.0116649	-0.00237548
M+3	0.000846953	0.00162773	0.00179801	-0.000430443	0.00107706	-0.000242399		0.00102597	-0.00796961	-0.00380484	0.000509305	-0.00929943	0.00358602
M+4	0.000747474	0.000240914	0.000264844	0.00064658	-0.000150107	0.000706093		-0.00135036	-0.00104112	-0.000438193	-0.00425987	0.000204892	-0.00160905
M+5	0.0104268	0.0118117	0.00976063	0.0119952	0.0121913	0.0117351		0.00885519	0.0137618	0.0102692	0.0128059	0.0107052	0.00955063
M+6	0.00012434	-0.000607772	-0.000124685	-0.000865599	-0.000523303	-0.000666327		-0.0021387	-0.00325211	-0.00254561	-0.00286352	-0.00261845	-0.0023153
Matrix sum	1.00095	1.00087	1.00082	1.00081	1.00092	1.00085		1.00017	1.00028	1.00019	1.00028	1.0002	1.00019
Valine C17H39NO2Si2 (M-57 = C13H30NO2Si2)
1.36982	0	0	0	0	0	0
-0.343983	1.36982	0	0	0	0	0
-0.0495605	-0.343983	1.36982	0	0	0	0
0.0242074	-0.0495605	-0.343983	1.36982	0	0	0
0.000613446	0.0242074	-0.0495605	-0.343983	1.36982	0	0
-0.00119178	0.000613446	0.0242074	-0.0495605	-0.343983	1.36982	0
5.1664e-05	-0.00119178	0.000613446	0.0242074	-0.0495605	-0.343983	1.36982

## Sheet: Leucine
	MDA CD73neg A	MDA CD73neg B	MDA CD73neg C	MDA CD73pos A	MDA CD73pos B	MDA CD73pos C		MDA CD73neg A, 1:10 dilution	MDA CD73neg B, 1:10 dilution	MDA CD73neg C, 1:10 dilution	MDA CD73pos A, 1:10 dilution	MDA CD73pos B, 1:10 dilution	MDA CD73pos C, 1:10 dilution		MTBSTFA + Mox	MTBSTFA + Mox
Leucine (302,274)	1.026e+06	1.0107e+06	1.28243e+06	1.04101e+06	1.25612e+06	1.24781e+06		52421.2	58294.2	74044.5	70158.7	61669.5	61939.7		170.632	175.822
Leucine M+1	272785	270070	339144	274733	329286	325666		14137.1	15723.4	19382.5	18331.1	17260.4	17827.3
Leucine M+2	103007	103512	130494	106687	126685	126482		5481.04	5547.93	7951.82	7609.42	6493.15	6805.76
Leucine M+3	17805.4	17198.4	22867.4	18384.5	21201.5	22066.5		969.417	1279.4	1279.9	1233.87	1041.22	1124.64
Leucine M+4	3611.2	2927.07	3703.4	3283.91	3841.78	3735.06		63.896	53.7075	117.94	129.646	117.897	0
Leucine M+5	283.766	324.133	570.434	333.607	241.625	592.947		0	0	0	0	0	0
Leucine M+6	0	0	56.398	0	0	0		0	0	0	0	0	0
Leucine M+7	0	0	0	0	0	0		0	0	0	0	0	0
Sum of all ions	1.42349e+06	1.40473e+06	1.77927e+06	1.44444e+06	1.73738e+06	1.72636e+06		73072.6	80898.6	102777	97462.7	86582.2	87697.3
Normalization per ion	0.720763	0.719497	0.720764	0.720706	0.722999	0.722802		0.717385	0.720583	0.720441	0.719852	0.712265	0.706289
	0.191631	0.192257	0.190608	0.190201	0.18953	0.188644		0.193466	0.19436	0.188588	0.188083	0.199353	0.203282
	0.0723618	0.0736879	0.0733414	0.0738606	0.0729174	0.0732651		0.0750082	0.0685787	0.0773699	0.0780751	0.0749941	0.0776051
	0.0125082	0.0122432	0.0128521	0.0127278	0.0122031	0.0127821		0.0132665	0.0158148	0.0124533	0.0126599	0.0120258	0.0128241
	0.00253686	0.00208372	0.00208142	0.00227349	0.00221125	0.00216355		0.000874418	0.000663886	0.00114754	0.00133022	0.00136168	0
	0.000199345	0.000230744	0.0003206	0.00023096	0.000139074	0.000343467		0	0	0	0	0	0
	0	0	3.16973e-05	0	0	0		0	0	0	0	0	0
	0	0	0	0	0	0		0	0	0	0	0	0
Matrix Correction	MDA CD73neg A	MDA CD73neg B	MDA CD73neg C	MDA CD73pos A	MDA CD73pos B	MDA CD73pos C
M	0.998293	0.996539	0.998295	0.998214	1.00139	1.00112		0.993614	0.998043	0.997847	0.997031	0.986523	0.978246
M+1	0.00363425	0.00496204	0.00221778	0.00167415	-8.71348e-05	-0.00124331		0.0074034	0.00747933	-0.000462308	-0.000948863	0.0174169	0.0250282
M+2	-0.00258811	-0.000920689	-0.000860085	9.82863e-06	-0.00115878	-0.000346183		0.000566297	-0.00881074	0.00546813	0.00665574	-0.00135558	0.00110939
M+3	0.000224107	-0.000685104	0.00039185	4.84199e-05	-0.000247533	0.000464009		0.000144209	0.00604771	-0.00153882	-0.00150011	-0.00196825	-0.00214132
M+4	0.000672104	9.48634e-05	-0.000154312	0.000122733	0.000254598	-5.99895e-05		-0.00198311	-0.00288057	-0.00153912	-0.0014065	-0.000711599	-0.00291171
M+5	-0.000219027	3.61393e-05	0.000122615	-5.26676e-05	-0.000159725	0.000122638		0.00014458	-6.06094e-05	0.000136508	7.87972e-05	3.26273e-05	0.000564231
M+6	-3.62555e-05	-3.37889e-05	-5.24058e-06	-2.78754e-05	-4.1085e-06	-6.05008e-05		0.000130166	0.000200476	0.000104165	0.000101727	6.92516e-05	0.000147697
M+7	1.83534e-05	3.86885e-06	-1.12614e-05	8.48164e-06	1.21874e-05	1.28755e-06		-1.69871e-05	-1.33895e-05	-1.34687e-05	-9.74688e-06	-5.07878e-06	-4.20201e-05
Matrix sum	0.999998	0.999997	0.999996	0.999997	0.999999	0.999995		1	1.00001	1	1	1	1
Leucine / Isoleucine
1.38505	0	0	0	0	0	0	0
-0.363204	1.38505	0	0	0	0	0	0
-0.0460788	-0.363204	1.38505	0	0	0	0	0
0.0249899	-0.0460788	-0.363204	1.38505	0	0	0	0
0.000342635	0.0249899	-0.0460788	-0.363204	1.38505	0	0	0
-0.00120892	0.000342635	0.0249899	-0.0460788	-0.363204	1.38505	0	0
6.56754e-05	-0.00120892	0.000342635	0.0249899	-0.0460788	-0.363204	1.38505	0
4.82151e-05	6.56754e-05	-0.00120892	0.000342635	0.0249899	-0.0460788	-0.363204	1.38505

## Sheet: Isoleucine
	MDA CD73neg A	MDA CD73neg B	MDA CD73neg C	MDA CD73pos A	MDA CD73pos B	MDA CD73pos C		MDA CD73neg A, 1:10 dilution	MDA CD73neg B, 1:10 dilution	MDA CD73neg C, 1:10 dilution	MDA CD73pos A, 1:10 dilution	MDA CD73pos B, 1:10 dilution	MDA CD73pos C, 1:10 dilution		MTBSTFA + Mox	MTBSTFA + Mox
Isoleucine (302,274)	1.15855e+06	1.14887e+06	1.49941e+06	1.18128e+06	1.38276e+06	1.38891e+06		60742.5	66305	87145	81528.8	69998.9	71033.7			0
Isoleucine M+1	307436	298383	395391	309965	363263	363421		16949.3	17920.6	22905.5	20827.7	18488.1	17849.3
Isoleucine M+2	117059	117217	150057	120551	137588	140459		6485.72	7214.76	8817.79	9100.37	6551.02	7108.51
Isoleucine M+3	19890.8	21535.5	25038.2	20557.4	23875.6	23459.4		575.154	1179.02	1405.6	1342.45	1189.8	1179.5
Isoleucine M+4	3488.06	3605.55	4867.49	3727.73	4428.68	3966.52		32.6	0	168.671	120.534	236.563	0
Isoleucine M+5	334.444	239.955	479.824	331.494	482.423	239.808		0	0	0	0	0	0
Isoleucine M+6	0	0	0	0	0	0		0	0	0	0	0	0
Isoleucine M+7	0	0	0	0	0	0		0	0	0	0	0	0
Sum of all ions	1.60676e+06	1.58985e+06	2.07525e+06	1.63642e+06	1.9124e+06	1.92046e+06		84785.3	92619.4	120443	112920	96464.3	97171.1
Normalization per ion	0.721048	0.722628	0.722523	0.721873	0.72305	0.723219		0.716428	0.715887	0.72354	0.722006	0.725645	0.731017
	0.191339	0.187679	0.190527	0.189417	0.189952	0.189237		0.199908	0.193486	0.190178	0.184447	0.191657	0.18369
	0.0728541	0.0737282	0.0723079	0.0736677	0.0719456	0.0731383		0.0764959	0.0778969	0.0732116	0.0805914	0.0679114	0.0731546
	0.0123794	0.0135456	0.0120652	0.0125624	0.0124846	0.0122155		0.00678366	0.0127298	0.0116703	0.0118885	0.0123341	0.0121384
	0.00217086	0.00226785	0.0023455	0.00227798	0.00231578	0.00206541		0.000384501	0	0.00140043	0.00106743	0.00245234	0
	0.000208148	0.000150929	0.000231213	0.000202573	0.000252261	0.000124871		0	0	0	0	0	0
	0	0	0	0	0	0		0	0	0	0	0	0
	0	0	0	0	0	0		0	0	0	0	0	0
Matrix Correction
M	0.998688	1.00088	1.00073	0.99983	1.00146	1.00169		0.992288	0.991539	1.00214	1.00001	1.00505	1.0125
M+1	0.00312727	-0.00251622	0.00146637	0.000164869	0.000478487	-0.000573872		0.0166736	0.0079754	0.000612959	-0.00676692	0.0018975	-0.0110889
M+2	-0.00181367	0.000653703	-0.00234303	-2.63933e-05	-0.00266023	-0.000756193		0.000331116	0.00462895	-0.00101134	0.0113622	-0.00898674	0.000921651
M+3	-0.000112488	0.00139335	-0.000275095	-4.53499e-05	0.000477144	-0.000291592		-0.00969592	-0.00168674	-0.00110871	-0.00326109	0.00172014	4.608e-05
M+4	0.000182091	-0.000238344	0.000543483	0.000178734	0.000352463	3.06488e-05		-0.000214969	-0.00313239	-0.000672091	-0.00169636	0.000825687	-0.00293871
M+5	-5.61129e-05	-0.000205643	-8.88243e-05	-9.24951e-05	-7.8092e-05	-0.000121842		0.000661782	0.00056091	-2.6385e-05	0.000268817	-0.000573516	0.000448003
M+6	-2.52668e-05	2.5017e-05	-4.86527e-05	-2.09475e-05	-4.38395e-05	8.52561e-06		-1.66057e-05	0.000157912	6.98034e-05	9.99571e-05	3.44542e-05	0.000154345
M+7	8.15696e-06	1.23957e-05	1.20287e-05	1.00833e-05	1.08853e-05	8.92564e-06		-3.28729e-05	-4.25858e-05	-2.13621e-06	-1.9755e-05	3.09844e-05	-3.69692e-05
Matrix sum	0.999998	1	0.999997	0.999998	0.999997	0.999999		0.999994	1	1	1	1	1
Leucine / Isoleucine
1.38505	0	0	0	0	0	0	0
-0.363204	1.38505	0	0	0	0	0	0
-0.0460788	-0.363204	1.38505	0	0	0	0	0
0.0249899	-0.0460788	-0.363204	1.38505	0	0	0	0
0.000342635	0.0249899	-0.0460788	-0.363204	1.38505	0	0	0
-0.00120892	0.000342635	0.0249899	-0.0460788	-0.363204	1.38505	0	0
6.56754e-05	-0.00120892	0.000342635	0.0249899	-0.0460788	-0.363204	1.38505	0
4.82151e-05	6.56754e-05	-0.00120892	0.000342635	0.0249899	-0.0460788	-0.363204	1.38505

[truncated: 36 more sheets: Succinic, Proline, Fumaric, Hypotaurine, Taurine, Pyroglutamic, Methionine, Serine, 2-KGA, Threonine, Phe-Ala, Malic, Aspartic, HydroxyProline, Cysteine, 2-HGA, Glutamic, Ornithine, Asparagine, Glyceraldehyde-3P …]
