# Supplementary material for: The CD73 immune checkpoint promotes tumor cell metabolic fitness
Source: eLife journal article supplement (doi:10.7554/elife.84508), 2023-06-01
Supplement: fig1-data2 [file SITA_GLN_2019.xlsx]

## Sheet: comments
Color codes
	Saturating or near saturating
	Good peaks shape and integral
	Ambiguous or near limit of detection
	Not detected
	Not part of selective ion monitoring method
	Not analyzed in diluted scan
Compound Method
Name	Scan	diluted scan	SIM	comments
2-Hydroxyisobutyric (275,260)
2-hydroxybutyric
2-hydroxyglutaric (433,245)
2P-Glycerol M+0
2-phosphoGlycertate (585,383)
3-hydroxybutyrate (275,233)
3-hydroxyisobutyrate
3P-glycerol M+0
3-phosphoglycerate (585,383)				very small peak in scan - not at all reliable - qualifier not detected in SIM
Adenine 2TBDMS				on the weak side but M+0 okay
aketoglutarate (346,258)
Alanine (260,232)
Aminoadipic 3TBDMS ?
Asparagine (417,302)				under palmitic - and very close to another metabolite - better in SIM
Aspartic (418,390)
b-alanine M+0
Cis-aconitic (459,327)				not terrible by Scan but a bit noisey - better by SIM
Citric (459,431)
Creatinine (284,341)
Cysteine (406,378)
Cytosine M+0 1TBDMS
Cytosine M+0 2TBDMS
DHAP 1/2 (484,452,383)
DHAP 2/2 (484,452,383)
Ethanolamine (232,144)				STRONG IN BLANKS - CONTAMINATION
Fumaric (287,329)
GABA M+0
Glucose 22.63' min				note that glucose makes multi. Peaks -
Glucose 22.9 min				note that glucose makes multi. Peaks -
Glucose 23.017 min				note that glucose makes multi. Peaks -
Glutamic (432,330)
Glutamine (431,329)
Glyceraldehyde-3P (484,457,425)
Glycerol M+0
Glycine (246,218)
Glycolic Acid (247,189) ?
Histidine (440,338)				peak shape is not very good. SIM looks like co-eluting peak - cutting off at 22.29'
Homocysteine (420,392)
Hydroxyproline (416,388)				Qualifier retention time not the same as quantifying ion - ambiguous
Hypotaruine (280,158)
Isocitric (459,431)				use SIM data - scan peak gets broad with higher isotopic masses
Isoleucine (302,274)
Lactic (261,233)
Leucine (302,274)
Linoelaidic M0 337,129,379
Lysine (431,488)				better by SIM
Malic (419,287)
Methionine (320,292)
Myristic M+0 (285,129,327)
Myristic-D27 ISTD
n-acetyl aspartic acid M+0
N-acetylAspartic (3TBDMS) M+0
Niacinamide (179, 136, 221)
Oleic Acid M0
Ornithine (474,417)				tailing from glutamic acid too strong
Oxaloacetic (332,374)
Palmitelaidic acid M+0 311, 129,353
Palmitic M+0
Phenylalanine (336,308)
Phosphoenolpyruvic (453,495)
Phosphoserine (584,482)
Proline (286,258)
Propylene glycol 2TBDMS 247,189 ?
Pyroglutamic (300,272)
Pyruvic (174,115)
sarcosine
Serine (390,362)
Stearic M+0 341,129,383
Succinic (289,331)
Taurine				Ugly peak shape due to phosphate eluting closely to taurine -look also at diluted
Threonine (404,376)
Thymine M+0 2 TBDMS				two peaks with similar spectra and rettention times. Cannot tell which is thymine which is something else. Thus ambiguous. Larger peak is of nice shape and intensity
Typtophan 3TBDMS 489 531 244
Tyrosine (466,302)
Uracil M+0
Urea 3-TBDMS (?)
Urea (231, 273)
Uric acid (576,395,511)
Valine (288)
Hypoxanthine
xanthine

## Sheet: Scan raw data
SCAN DATA	1 MDA CD73pos	2 MDA CD73pos	3 MDA CD73pos	4 MDA CD73neg	5 MDA CD73neg	6 MDA CD73neg	blank	blank
Name	Area	Area	Area	Area	Area	Area	Area	Area
Myristic-D27 ISTD	940329	1.07652e+06	1.13862e+06	1.14118e+06	964864	1.11643e+06	0	0
Pyruvic (174,115)	109836	195005	153424	304819	182133	201589	0	0
Pyruvic M+1	14573	23489.7	20231.5	38156.8	23685.6	25185.8	0	0
Pyruvic M+2	5630.3	9340.95	8088.12	13783.6	9786.59	9546.22	0	0
Pyruvic M+3	706.62	1422.11	1630.05	2320.61	1655.52	2282.47	0	0
Lactic (261,233)	6.95627e+06	8.91029e+06	8.82376e+06	1.00551e+07	8.14739e+06	9.39942e+06	43597.8	64834.2
Lactic M+1	1.59257e+06	2.07682e+06	2.04022e+06	2.32936e+06	1.88834e+06	2.16851e+06	10931.5	14541.3
Lactic M+2	668814	880003	867739	987767	800444	904232	4305.06	5889.84
Lactic M+3	123192	162339	162504	174546	143073	163848	560.144	797.861
Alanine (260,232)	133001	217689	199514	172638	137732	154124	0	0
Alanine m+1	30754.1	52093.2	45921.9	40208	31509.3	34594	0	0
Alanine m+2	12328.3	22109.2	19527.9	16340.6	13175.3	15162.2	0	0
Alanine m+3	3871.79	6882.43	6127.37	4970.67	3806.4	4220.32	0	0
Glycine (246,218)	580019	915427	741812	1.137e+06	885866	818090	325.759	586.029
Glycine m+1	128746	204149	166505	258955	197113	184749	156.891	347.514
Glycine m+2	53929.1	86235.9	70009.3	108206	84716.9	76545.2	0	137.129
Glucose 2 M	34165.8	106152	80919.5	112749	61267.5	85718.8	0	0
Glucose 2 M+1	18350.2	55667.8	40301.7	58045.8	29457.2	42971.9	0	0
Glucose 2 M+2	9480.44	29239.7	20813.7	29776.4	17203.6	22715	0	0
Glucose 2 M+3	3555.18	8940.55	6703.11	9520.91	5227.79	7375.15	0	0
Glucose 2 M+4	805.991	2521.58	1994.38	2612.29	1479.54	2276.67	0	0
Glucose 2 M+5	227.9	529.16	444.056	519.793	286.855	440.626	0	0
Glucose 2 M+6	0	69.0595	96.761	0	0	0	0	0
3-hydroxybutyrate (275,233)	639.526	1316.86	794.957	1727.23	857.218	1238.47	0	0
3-hydroxybutyrate M+1	156.891	401.73	159.638	228.868	148.658	259.929	0	0
3-hydroxybutyrate M+2	118.739	297.476	234.217	430.808	88.265	250.695	0	0
3-hydroxybutyrate M+3	0	0	0	0	0	0	0	0
Urea (231, 273)	21903.9	56137.5	31390.5	40737.9	25938	34042.2	0	0
Urea (M+1)	5903.3	12472.2	7154.21	9662.34	6207.88	7246.11	0	0
Urea (M+2)	2052.16	5217.08	2863.98	145.271	2400.25	3308.96	55.42	696.878
Urea (M+3)	364.029	765.376	442.048	622.482	295.386	688.335	0	0
Leucine (302,274)	398850	647961	604073	701363	464261	629564	0	347.521
Leucine M+1	104027	170645	159809	183678	123243	166295	0	0
Leucine M+2	41304.5	66915.8	62389.8	72420.1	47560.9	64155.4	0	0
Leucine M+3	7765.91	12128	10916.6	12865.1	8161.05	11041.8	0	0
Leucine M+4	791.103	2229.18	1894.76	2099.5	1560.89	1854.01	0	0
Leucine M+5	0	93.4685	150.136	219.819	0	123.477	0	0
Leucine M+6	0	0	0	0	0	0	0	0
Leucine M+7	0	0	0	0	0	0	0	0
Isoleucine (302,274)	513053	817341	775250	889557	581163	788969	0	156.413
Isoleucine M+1	135018	214059	203232	232398	153964	205049	0	0
Isoleucine M+2	52891.3	85208.1	79866.7	92790.9	59893.6	79705.4	0	0
Isoleucine M+3	8440.36	14998.7	15158.4	15534.3	10394.8	14412.5	0	0
Isoleucine M+4	1437.14	2708.67	2419.79	2608.81	1444.52	2199.56	0	0
Isoleucine M+5	0	61.0837	191.803	314.386	77.5205	163.401	0	0
Isoleucine M+6	0	0	0	0	0	0	0	0
Isoleucine M+7	0	0	0	0	0	0	0	0
Succinic (289,331)	16384.6	25217.2	23890.1	34005.3	25343.2	28799.5	0	0
Succinic +1	5953.13	8549.44	8334.41	12884.1	8679.48	10640.9	0	0
Succinic +2	10015.1	14590.5	13348.1	21528.4	15103	21091	0	0
Succinic +3	3615.19	5593.38	5366.23	8760.02	5810.54	6381.69	0	0
Succinic +4	44601.5	64639.7	59249	98429.2	65050	81514.9	0	0
Proline (286,258)	50694.3	155268	80285.4	160734	106004	104745	0	0
Proline M+1	12719	42324.3	22448.2	45550.4	28881.7	28175.8	0	0
Proline M+2	7005.02	21136.6	10959.3	22514.7	15685.6	14711.3	0	0
Proline M+3	7247.61	21532.3	12266	28289	18538.2	19478.5	0	0
Proline M+4	2861.28	10421.7	5002.06	12782.8	7682.91	7652.84	0	0
Proline M+5	39440.5	118073	61821.5	152645	89096.7	92873.5	0	0
Proline M+6	7537.27	21889.3	12950.5	29186.1	18046.9	18951.2	0	0
Fumaric (287,329)	78171.3	127171	124789	121945	84148.5	98591.3	0	0
Fumaric M+1	22385.3	37212.9	33850.7	35804.1	24467.9	28952.8	0	0
Fumaric M+2	20751.6	32943.8	32647.5	35706.7	25333	30501.9	0	0
Fumaric M+3	20956.5	31269.4	30303.2	33134.8	22334.4	28015.9	0	0
Fumaric M+4	63244.7	92292.6	91715.6	105831	67990.4	89621.8	0	0
Hypotaruine (280,158)	82954.8	145468	102480	130000	110052	88600.9	0	0
Hypotaurine M+1	18621.5	32523.8	23298.4	29884.3	23635.7	20275.7	0	0
Hypotaurine M+2	12875.2	22829.3	15782.8	19474.1	16157.3	13247.4	79.4795	325.81
Taurine	555328	996698	714550	885427	763333	619302	136.838	90.302
Taurine M+1	104734	199357	134516	157541	151760	132149	0	57.288
Taurine M+2	64939.6	115508	80777.3	88652.4	86348.2	75374.8	0	0
Oxaloacetic (332,374)	0	0	0	0	0	0	0	0
Oxaloacetic m+1	0	0	0	0	0	0	0	0
Oxaloacetic m+2	0	0	0	0	0	0	0	0
Oxaloacetic m+3	0	0	0	0	0	0	0	0
Oxaloacetic m+4	0	0	0	0	0	0	0	0
Pyroglutamic (300,272)	287969	541851	414800	626508	383988	441371	0	0
Pyroglutamic M+1	78640.5	149243	113460	171463	105698	123627	0	0
Pyroglutamic M+2	47035.5	77103.4	62867.9	94932.5	57475.1	68504.1	0	0
Pyroglutamic M+3	60824	103260	85050.9	132468	83545.7	102495	0	0
Pyroglutamic M+4	36204.5	54895.6	47207.9	74426.3	43158.3	54468	0	0
Pyroglutamic M+5	573105	854830	707868	1.10399e+06	635155	823954	0	0
Pyroglutamic M+6	112382	170238	143676	217695	126341	160340	0	0
Methionine (320,292)	54395.3	83583.8	75890.7	89926.8	60620.8	77559.6	0	0
Methionine M+1	14165.5	21530.2	19694.2	24168.7	16842.2	19193.2	0	0
Methionine M+2	8276.52	12606.6	11146.9	13197.1	8946.23	12458.4	0	0
Methionine M+3	1820.01	2407.82	2225.69	2294.3	1853.88	2263.01	0	0
Methionine M+4	129.748	235.788	188.531	612.988	163.797	383.253	0	0
Methionine M+5	0	0	0	0	0	0	0	0
Methionine M+6	0	0	0	0	0	0	0	0
Serine (390,362)	342817	529791	437424	551529	332866	364244	0	0
Serine m+1	118290	183468	148579	190802	116254	123363	0	0
Serine m+2	53602.6	84434.1	66369.1	88616.2	52063.5	57632	0	0
Serine m+3	12139	19879.6	16028.8	20923.1	11818.2	13565.1	0	0
Serine M+4	3629.74	4630.52	4244.8	5351.84	3137.23	3086.74	0	0
aketoglutarate (346,258)	23765.5	38180.2	35473.8	51700.7	36798.6	48720.7	0	0
aketoglutarate m+1	9083.69	14339.8	12911.5	18593.4	13750.3	17965.5	0	0
aketoglutarate m+2	6373.2	11495.7	10325.9	15132	10701.8	14195.3	0	0
aketoglutarate m+3	15517.2	24686.9	21937.5	39328.5	25948.4	35599.2	0	0
aketoglutarate m+4	7666.17	11561.9	10220.4	16627.8	10714.4	15525.3	0	0
aketoglutarate m+5	98143.9	142497	133424	211599	135421	190769	0	0
Threonine (404,376)	707679	1.28354e+06	1.04547e+06	1.59168e+06	964202	1.06568e+06	0	0
Threonine M+1	254168	457247	368530	568747	341406	386928	0	0
Threonine M+2	115080	211897	172679	268359	161459	174224	0	0
Threonine M+3	26813.7	50276.5	39816	59749.1	37072.7	40418.2	0	0
Threonine M+4	6369.39	11017.4	9471.55	13368.2	8183.65	10074.8	0	0
Threonine M+5	957.922	1792.08	1412.81	2343.58	1526.8	1589.91	0	0
Phenylalanine (336,308)	166460	254745	228990	281435	186715	239439	0	0
Phenylalanine M+1	49072	73774.8	66556.4	84117.9	53583.7	71585.4	0	0
Phenylalanine M+2	17657.8	28122.4	24828.1	30558.9	20177.3	26838.2	0	0
Phenylalanine M+3	3713.92	5455.77	5422.41	5947.24	4163.66	5196.88	0	0
Phenylalanine M+4	541.297	940.424	761.116	967.767	575.314	842.106	0	0
Phenylalanine M+5	0	0	0	0	0	0	0	0
Phenylalanine M+6	0	0	0	0	0	0	0	0
Phenylalanine M+7	0	0	0	0	0	0	0	0
Phenylalanine M+8	0	0	0	0	0	0	0	0
Phenylalanine M+9	0	0	0	0	0	0	0	0
Phenylalanine M+10	0	0	0	0	0	0	0	0
Malic (419,287)	213071	345895	334236	309057	217236	316304	0	0
Malic M+1	89200.2	145704	141096	130495	92774	135045	0	0
Malic m+2	85364	143036	139880	144264	100187	148971	0	0
Malic m+3	86997.2	137099	133577	145449	100568	147869	0	0
Malic m+4	251865	400208	379022	423686	273972	422957	0	0
Aspartic (418,390)	152146	275503	209973	142612	112095	114636	0	0
Aspartic M+1	65138.3	113741	90053.2	60853.9	49610.1	49352.7	0	0
Aspartic M+2	63016.6	111795	88672.4	64414.9	53518.3	52762.3	0	0
Aspartic M+3	59291.2	104800	81298.6	65532.4	48238.9	53189.8	0	0
AsparticM+4	180618	303333	240343	193455	142142	147466	0	0
Aspartic M+5	56580	96853.6	75343.5	61101.3	44907.1	47762.8	0	0
Hydroxyproline (416,388)	2270.15	3070.5	3042.78	4209.59	2572.42	3108.76	0	0
Hydroxyproline M+1	511.882	817.41	499.882	1570.81	527.545	971.965	0	0
Hydroxyproline M+2	156.95	665.308	246.482	176.188	449.135	263.167	0	0
Hydroxyproline M+3	0	0	0	0	0	0	0	0
Hydroxyproline M+4	0	0	0	0	0	0	0	0
Hydroxyproline M+5	0	0	0	0	0	0	0	0
Hydroxyproline M+6	0	0	0	0	0	0	0	0
Cysteine (406,378)	180112	266263	212980	280703	209874	267976	0	0
Cysteine M+1	65978.2	90482.5	73894.5	96070.6	74784.5	94248.1	0	0
Cysteine M+2	38133.1	53383.1	43178	56384.5	42901.8	51165.3	0	0
Cysteine M+3	9357.29	14312.2	11231.7	14695.2	10413.4	13914.2	0	0
Cysteine M+4	3033.93	4798.6	3514.31	4385.28	3250.14	3985.13	0	0
2-hydroxyglutaric (433,245)	3974.8	5461.88	5354.67	7439.9	4874.44	6314.05	0	0
2-hydroxyglutaric M+1	1481.67	2129.14	2346.76	3107.46	1985.74	2487.22	0	0
2-hydroxyglutaric M+2	825.476	1445.67	1240.96	1625.07	1639.37	1571.26	0	0
2-hydroxyglutaric M+3	1230.86	1863.57	1366.34	3120.04	2045.93	2970.77	0	0
2-Hydroxyglutaric M+4	640.319	965.432	921.927	1461.56	1103.92	1579.4	0	0
2-hydroxyglutaric M+5	6420.39	10188.1	8451.94	15207.8	10635.8	13610.4	0	0
Phosphoenolpyruvic (453,495)	0	0	0	0	0	0	0	0
Phosphoenolpyruvic m+1	0	0	0	0	0	0	0	0
Phosphoenolpyruvic m+2	0	0	0	0	0	0	0	0
Phosphoenolpyruvic m+3	0	0	0	0	0	0	0	0
Glutamic (432,330)	1.3657e+06	1.72589e+06	1.52755e+06	1.53337e+06	1.47016e+06	1.25102e+06	0	0
Glutamic m+1	363.68	797863	710434	722689	702122	698204	0	170.739
Glutamic m+2	487005	114064	358976	574939	546882	482517	0	0
Glutamic m+3	1.02553e+06	1.2295e+06	1.12675e+06	1.28145e+06	1.17592e+06	1.22163e+06	0	0
Glutamic m+4	585391	688207	638358	705795	626741	667046	0	111.972
Glutamic m+5	5.74567e+06	6.18634e+06	6.01224e+06	6.65676e+06	5.65076e+06	6.07562e+06	127.466	288.561
Glutamic M+6	1.82395e+06	1.98223e+06	1.88467e+06	2.10254e+06	1.76104e+06	1.90385e+06	0	0
Ornithine (474,417)	0	0	0	0	0	0	0	0
Ornithine M+1	0	0	0	0	0	0	0	0
Ornithine M+2	0	0	0	0	0	0	0	0
Ornithine M+3	0	0	0	0	0	0	0	0
Ornithine M+4	27117.3	2340.21	29731.2	3682.93	28691	29683.3	0	0
Ornithine M+5	0	0	0	0	0	0	0	0
Ornithine M+6	0	0	0	0	0	0	0	0
Asparagine (417,302)	1962.86	3323.6	2276.57	2493.64	2999.86	2682.74	0	0
Asparagine M+1	594.973	1253.65	790.054	1220.54	854.073	1119.06	0	0
Asparagine M+2	351.167	915.958	722.896	845.112	1007.32	455.433	0	0
Asparagine M+3	576.669	651.719	408.601	1168.99	1096.18	598.743	0	0
Asparagine M+4	994.652	1426.87	1518.25	1702.3	1640.13	1323.59	0	0
Asparagine M+5	40.1961	555.302	595.943	435.353	386.65	303.707	0	0
Asparagine M+6	0	357.806	103.595	121.501	33.5265	124.532	0	0
Asparagine M+7	0	0	0	0	0	0	0	0
Glyceraldehyde-3P (484,457,425)	5458.39	7707.11	6427.99	13135.9	4465.78	6331.59	0	0
Glyceraldehyde-3P M+1	2055.65	3174.62	2547.01	4558.81	1404.44	2738.26	0	0
Glyceraldehyde-3P M+2	806.327	1142.58	1072.44	2113.04	724.696	1105	0	0
Glyceraldehyde-3P M+3	199.267	245.518	187.296	560.769	125.714	0	0	0
Homocysteine (420,392)	0	0	0	0	0	0	0	0
Homocysteine M+1	0	0	0	0	0	0	0	0
Homocysteine M+2	0	0	0	0	0	0	0	0
Homocysteine M+3	0	0	0	0	0	0	0	0
Homocysteine M+4	0	0	0	0	0	0	0	0
DHAP 1/2 (484,452,383)	90748.1	131622	123165	151597	86385.4	122134	0	0
DHAP 1/2 M+1	31363.2	47337.2	43306.2	52229.4	30175	41818.8	0	0
DHAP 1/2 M+2	14828.4	23134.2	21076.1	25505.7	14817.3	20265.2	0	0
DHAP 1/2 M+3	4067.91	5064.79	4956.21	6216.83	3372.15	5018.55	0	0
DHAP 2/2 (484,452,383)	66841.8	100617	90956.3	111327	64862.8	90855.9	0	0
DHAP 2/2 M+1	23937.4	34685.4	32036.7	40176.6	22599.4	32152.3	0	0
DHAP 2/2 M+2	11984.5	16998.6	15958	19147.7	11022	14955.6	0	0
DHAP 2/2 M+3	2744.74	4778.72	3636.4	4025.32	2517.07	3324.39	0	0
Lysine (431,488)	1586.59	3368.61	2436.01	2718.29	2133.08	1677.07	0	0
Lysine M+1	579.936	1417.97	850.71	1200.2	913.323	777.662	0	0
Lysine M+2	98.6855	610.398	216.28	563.669	332.27	173.868	0	0
Lysine M+3	0	88.6125	0	0	0	0	0	0
Lysine M+4	0	0	0	0	0	0	0	0
Lysine M+5	0	0	0	0	0	0	0	0
Lysine M+6	0	0	0	0	0	0	0	0
Lysine M+7	2310.19	0	0	0	0	0	0	0
Lysine M+8	0	0	0	0	0	0	0	0
Glutamine (431,329)	64146.4	87322.2	74298.9	78998.6	79618.9	72978.1	0	0
Glutamine M+1	25960.9	37194.1	31403.8	33568.4	32590.1	30852.7	0	0
Glutamine M+2	14369.7	20242.5	17107.4	18884.1	17855	17532.1	0	0
Glutamine M+3	19315.8	23960.3	20981.3	23932.8	21887.4	20653.2	0	0
Glutamine M+4	230788		248033	304133	267668	258564	0	0
Glutamine M+5	5.55237e+06			7.29728e+06	6.48136e+06	6.26467e+06	0	0
Glutamine M+6	1.82142e+06	2.36144e+06	1.99674e+06	2.39386e+06	2.14214e+06	2.07828e+06	0	0
Glutamine M+7	868087	1.11915e+06	942688	1.1349e+06	1.01992e+06	979510	0	0
Cis-aconitic (459,327)	986.938	2161.82	1957.11	1841.53	1241.06	1466.55	0	0
Cis-aconitic M +1	403.908	1105.21	480.205	1194.86	494.668	473.572	0	0
Cis-aconitic M+2	660.822	994.846	971.646	904.278	866.255	819.498	0	0
Cis-aconitic M+3	636.215	704.916	970.415	637.593	663.891	703.619	0	0
Cis-aconitic M+4	1097.32	1894.23	1564.52	2109.09	1118.26	1598.45	0	0
Cis-Aconitic M+5	766.565	1126.74	1069.95	1683.43	795.582	1028.58	0	0
Cis-aconitic M+6	333.159	263.488	453.745	528.836	369.397	417.499	0	0
2-phosphoGlycertate (585,383)	0	0	0	0	0	0	0	0
2-phosphoglycerate M+1	0	0	0	0	0	0	0	0
2-phosphoglycerate M+2	0	0	0	0	0	0	0	0
2-phosphoglycerate M+3	0	0	0	0	0	0	0	0
Histidine (440,338)	6678.4	18106	9096.96	11588.1	11162.1	8052.02	0	0
Histidine M+1	2613.18	6523.97	3839.25	4820.8	5568.69	3376.83	0	0
Histidine M+2	1182.5	3278.49	1720.62	1670.77	2545.93	1676.76	0	0
Histidine M+3	417.841	1417.53	1112.93	888.895	1177.9	866.425	0	0
Histidine M+4	0	0	0	0	0	0	0	0
Histidine M+5	0	0	0	0	0	0	0	0
Histidine M+6	0	0	0	0	0	0	0	0
Histidine M+7	0	0	0	0	0	0	0	0
Histidine M+8	0	0	0	0	0	0	0	0
Citric (459,431)	87931	151484	138289	143608	102483	135510	0	0
Citric m+1 (460,432)	40130.4	69529.7	65313.2	67809.3	48110.5	64735.4	0	0
Citric m+2 (461,433)	39529.3	71644	64168.3	66914	50880.4	66332.7	0	0
Citric m+3 (462,434)	39292.5	64875.6	59041.9	65465.5	48176.2	65652.4	0	0
Citric m+4 (463,435)	87712.3	144638	132838	147483	106145	150971	0	0
Citric m+5 (464,436)	60717.3	98350.9	90825.9	102496	76142.7	104265	0	0
Citric m+6 (465, 437)	26249.9	40794.6	38781	42878.6	31281	43051	0	0
3-phosphoglycerate (585,383)	0	0	0	0	0	0	0	0
3-phosphoglycerate M+1	0	0	0	0	0	0	0	0
3-phosphoglycerate M+2	0	0	0	0	0	0	0	0
3-phosphoglycerate M+3	0	0	0	0	0	0	0	0
Isocitric (459,431)	350.619	1256.5	1218.69	1525.84	964.704	1435.56	0	0
Isocitric m+1 (460,432)	179.508	529.229	384.376	475.103	640.197	454.243	0	0
Isocitric m+2 (461,433)	278.429	632.178	762.057	693.37	459.939	536.448	0	0
Isocitric m+3 (462,434)	455.781	702.141	429.836	336.756	216.185	843.703	0	0
Isocitric m+4 (463,435)	1057.72	1152.58	728.887	675.966	920.09	1331.24	0	0
Isocitric m+5 (464,436)	642.737	1456.84	1441.88	1468.14	1039.18	1381.39	0	0
Isocitric m+6 (465, 437)	280.044	507.109	354.891	707.786	527.199	1043.78	0	0
Tyrosine (466,302)	149247	231344	205704	280161	168025	226602	0	0
Tyrosine M+1	60978.8	91261.8	84234.8	112942	67662.4	91582.5	0	0
Tyrosine M+2	26990.3	41956.1	36900.7	49021	30251.3	40207.4	0	0
Tyrosine M+3	7529.53	11583.9	9659.17	14241.8	8773.99	10343.8	0	0
Tyrosine M+4	1738.74	3083.02	2813.52	3249.13	2404.19	3001.38	0	0
Tyrosine M+5	378.07	912.465	488.281	714.547	262.422	594.965	0	0
3-hydroxybutyrate M+4	0	0	0	0	0	0	0	0
3-Hydroxy isobutyric (275,260)	0	0	0	0	0	0	0	0
3-Hydroxy isobutyric M+1	0	0	0	0	0	0	0	0
3-Hydroxy isobutyric M+2	0	0	0	0	0	0	0	0
3-Hydroxy isobutyric M+3	0	0	0	0	0	0	0	0
Phosphoserine (584,482)	0	0	0	0	0	0	0	0
Phosphoserine M+1	0	0	0	0	0	0	0	0
Phosphoserine M+2	0	0	0	0	0	0	0	0
Phosphoserine M+3	0	0	82.4055	110.995	0	0	0	0
Phosphoserine M+4	0	0	0	78.4455	0	0	0	0
3-Hydroxy isobutyric M+4	0	79.7475	0	0	0	0	0	0
Niacinamide (179, 136, 221)	6316.81	61270.4	11464.9	23097.1	40229.2	11937.5	0	0
Niacinamide M+1	932.599	9097.58	1076.6	3113.31	5156.7	1965.51	0	0
Niacinamide M+2	0	3098.88	628.427	781.529	1565.8	0	0	0
Niacinamide M+3	0	0	0	0	0	0	0	0
Niacinamide M+4	0	0	0	0	0	0	0	0
Niacinamide M+5	0	0	0	0	0	0	0	249.444
Niacinamide M+6	0	0	0	0	0	0	0	0
Uric acid (576,395,511)	0	0	0	0	0	0	0	0
Uric acid M+1	0	0	0	0	0	0	0	0
Uric Acid M+2	0	0	0	0	0	0	0	0
Uric Acid M+3	0	0	0	0	0	0	0	0
Uric Acid M+4	0	0	0	0	0	0	0	0
Adenine 2TBDMS	12004.1	36038.1	13017.2	17286	25286.9	15267	234.428	386.883
Adenine M+1	4022.54	10535.2	4035.29	4859.46	7880.78	3976.04	0	0
Adenine M+2	1321.46	3521.98	1406.51	1766.19	2604.01	1480.16	0	0
Adenine M+3	326.442	772.593	269.03	549.789	611.517	361.12	0	0
Adenine M+4	0	158.619	0	0	77.8423	0	0	0
Adenine M+5	0	0	0	0	0	0	0	0
Cytosine M+0 2TBDMS	4785.89	11308.5	4828.44	6242.12	7725.72	5605.58	0	73.6155
Cytosine M+1 2TBDMS	1499.64	3835.96	1612.2	1968.48	2373.31	2045.64	0	0
Cytosine M+2 2TBDMS	558.815	1125.07	540.64	523.84	808.254	881.3	0	0
Cytosine M+3 2TBDMS	0	0	0	0	0	0	0	0
Cytosine M+4 2TBDMS	0	0	0	0	0	0	0	0
Cytosine M+0 1TBDMS	0	0	0	0	0	0	0	0
Cytosine M+1 1TBDMS	0	0	0	0	0	0	0	0
Cytosine M+2 1TBDMS	0	0	0	0	0	0	0	0
Cytosine M+3 1TBDMS	0	0	0	0	0	0	0	0
Cytosine M+4 1TBDMS	0	0	0	0	0	0	0	0
Thymine M+0 2 TBDMS	10473.2	23636.6	14421.6	23835.5	16982.1	16360.6	282.997	81.375
Thymine M+1 2 TBDMS	2780.23	6331.43	3687.48	6317.13	4522.13	4256.99	0	0
Thymine M+2 2 TBDMS	1358.29	2293.53	1983.2	2655.18	1784.4	1574.31	0	0
Thymine M+3 2 TBDMS	0	0	0	0	0	0	0	0
Thymine M+4 2 TBDMS	0	0	0	0	0	0	0	387.858
Thymine M+5 2 TBDMS	0	0	0	0	0	0	0	0
Valine (288)	246779	374788	357263	435399	278751	367447	0	0
Valine M+1	60528.9	94748.6	88774.4	108389	68847.3	95239.1	0	0
Valine M+2	32300	52533.4	47723.8	58610.9	36303.7	51206.4	0	0
Valine M+3	6338.92	10142.3	9522.61	11026	6273.56	9925.14	0	0
Valine M+4	1672.14	2251.9	1976.01	2549.2	1671.49	2509.94	0	0
Valine M+5	76.2245	363.241	206.428	226.725	87.291	193.87	0	0
Valine M+6	0	0	0	0	0	0	0	0
2P-Glycerol M+0	4707.77	11338.6	6428.51	9877.87	7158.88	5615.79	0	0
2P-Glycerol M+1	2424.12	4936.47	2993.5	3843.13	2795.32	2484.97	0	0
2P-Glycerol M+2	1106.27	2793.47	1365.08	2182.88	1780.54	1283.94	0	0
2P-Glycerol M+3	262.096	858.706	390.465	588.512	282.017	311.311	0	0
3P-glycerol M+0	9313.45	19062.2	13675.3	16128.5	12365.2	10071.7	0	0
3P-glycerol M+1	4055.09	8198.91	5480.93	7189.14	5214.95	4378.12	0	0
3P-glycerol M+2	2442.69	4315.31	2934.3	3892.41	2920.01	2544.2	0	0
3P-glycerol M+3	552.409	1446.31	741.932	1052.62	798.025	728.491	0	0
GABA M+0	21158.8	30494.3	28999.1	31545.2	18683.8	23934.8	0	0
GABA M+1	5305.1	7675.04	6581.73	7488.91	4740.91	6061.87	0	0
GABA M+2	1994.04	3218.05	2733.33	3300.6	2335.96	2163.97	0	0
GABA M+3	273.31	554.655	475.321	403.954	362.462	267.033	0	0
GABA M+4	773.342	1211.38	1257.9	751.55	846.455	801.078	0	0
b-alanine M+0	166973	266657	243781	277697	178295	207831	0	0
b-alanine M+1	38482.5	58124.4	55841.1	63903.9	42034.1	45915.9	0	0
b-alanine M+2	15284	24220.6	21769.7	24988.2	16648.3	19315.3	0	0
b-alanine M+3	2444.58	3725.94	3698.45	3691.42	2804.94	3382.12	0	0
b-alanine M+4	388.327	569.618	688.871	851.57	336.809	458.262	0	0
Glycerol M+0	3663.2	12011.9	7888.89	22202	5506.21	8461.14	0	0
Glycerol M+1	1192.99	4149.99	2734.64	7266.68	1621.66	3212.49	0	0
Glycerol M+2	515.814	1764.5	1171.37	3499.08	888.696	1399.46	0	0
Glycerol M+3	78.8285	333.402	224.061	843.138	90.5525	233.161	0	0
n-acetyl aspartic acid M+0	19544.2	21864.4	22387.6	20727.1	18200.1	21919.3	0	0
n-acetyl aspartic acid M+1	5513.85	6210.91	6068.69	6259.5	4608.76	6609.82	0	0
n-acetyl aspartic acid M+2	2503.94	2788.65	2696.48	3632.32	2690.26	3623.32	0	0
n-acetyl aspartic acid M+3	780.114	973.299	906.208	1477.4	1041.56	1433.18	0	0
n-acetyl aspartic acid M+4	1215.14	1410	1284.89	1730.68	1975.16	1372.52	0	0
n-acetyl aspartic acid M+5	255.321	270.987	312.006	682.194	354.609	583.353	0	0
n-acetyl aspartic acid M+6	243.235	388.156	358.525	361.699	161.551	517.017	0	0
Glucose M+0	1377.93	3344.15	2468.59	3273.86	1461.81	2004.33	0	0
Glucose M+1	595.044	1458.92	1003.34	1656	880.141	1087.97	0	0
Glucose M+2	379.424	853.484	370.055	833.808	439.658	542.297	0	0
Glucose M+3	0	0	89.324	150.489	106.764	265.392	0	0
Glucose M+4	0	0	0	0	0	0	0	0
Glucose M+5	0	0	0	0	0	0	0	0
Glucose M+6	0	0	0	0	0	0	0	0
N-acetylAspartic (3TBDMS) M+0	6119.69	9764.48	10627.9	16191.9	5247.12	9276.86	0	0
N-acetylAspartic (3TBDMS) M+1	2533.27	3620.64	3806.32	6519.56	1832.16	3707.29	0	0
N-acetylAspartic (3TBDMS) M+2	987.444	1813.88	2001.25	2971.43	764.827	2008.33	0	0
N-acetylAspartic (3TBDMS) M+3	221.889	464.055	601.274	658.452	136.71	612.397	0	0
N-acetylAspartic (3TBDMS) M+4	280.769	487.25	406.791	910.682	336.109	641.867	0	0
N-acetylAspartic (3TBDMS) M+5	0	0	114.902	323.858	0	0	0	0
N-acetylAspartic (3TBDMS) M+6	0	0	49.476	135.498	0	0	0	0
Uracil M+0	38691.5	93805.6	54870.6	51804.5	56031.9	45823.6	4345.97	4686.63
Uracil M+1	9998.9	22884.1	13646.8	13434.3	13446.7	11575.9	1048.6	926.802
Uracil M+2	4822.95	10565	6416.77	6198.89	6449.95	5560.51	300.946	480.712
Uracil M+3	5058.2	10539.7	6613.44	8465.15	8026.07	7139.38	359.856	714.227
Uracil M+4	626.917	1997.56	1153.21	1808.85	1571.56	1798.62	0	162.167
Palmitic M+0	1.05451e+06	1.29564e+06	1.50764e+06	1.98707e+06	997649	1.00008e+06	79606.5	105321
Palmitic M+1	263770	323798	374152	493919	247977	250377	18868.5	26285.3
Palmitic M+2	70887.6	90282.7	102789	134952	67942.7	67331.3	5087.18	7581.9
Palmitic M+3	10662.8	14589.5	17168.6	21826.8	11048.3	10175.1	1014.99	978.943
Palmitic M+4	2269.82	3728.97	4115.95	6744.26	3008.46	2747.87	103.897	0
Palmitic M+5	695.797	1117.71	1323.47	1582.42	908.522	879.276	0	0
Palmitic M+6	2996.57	3233.64	3135.11	5308.09	3340.41	3745.14	0	0
Palmitic M+7	704.408	894.309	780.397	1139.66	945.572	1538.29	0	0
Palmitic M+8	520.442	744.275	578.247	816.879	541.643	345.864	0	0
Palmitic M+9	0	135.733	0	59.006	239.961	120.935	0	0
Palmitic M+10	54.033	0	102.927	213.381	99.6855	166.005	0	0
Palmitic M+11	0	0	0	0	0	0	0	0
Palmitic M+12	0	0	0	0	0	0	0	0
Palmitic M+13	0	0	0	0	0	0	0	0
Palmitic M+14	0	0	0	0	0	0	0	0
Palmitic M+15	0	0	0	0	0	0	0	0
Palmitic M+16	0	0	0	0	0	0	0	0
Stearic M+0 341,129,383	378912	379958	454872	572369	297400	292100	76003	69333.6
Stearic M+1	102243	102666	122971	157270	82717.1	79599.2	20678.7	17030.5
Stearic M+2	27054.5	27435.1	33740.7	40446.5	20462.4	20441.1	5105.95	4982.06
Stearic M+3	4194.41	4814.41	5436.63	6731.52	3758.46	3042.27	938.498	569.855
Stearic M+4	797.229	940.104	806.116	1137.97	450.746	715.316	0	0
Stearic M+5	0	252.007	0	179.492	0	0	0	0
Stearic M+6	0	0	0	0	0	0	0	0
Stearic M+7	0	0	0	0	0	0	0	0
Stearic M+8	0	0	0	0	0	0	0	0
Stearic M+9	0	0	0	0	0	0	0	0
Stearic M+10	0	0	0	0	0	0	0	0
Stearic M+11	0	0	0	0	0	0	0	0
Stearic M+12	0	0	0	0	0	0	0	0
Stearic M+13	0	0	0	0	0	0	0	0
Stearic M+14	0	0	0	0	0	0	0	0
Stearic M+15	0	0	0	0	0	0	0	0
Stearic M+16	0	0	0	0	0	0	0	0
Stearic M+17	0	0	0	0	0	0	0	0
Stearic M+18	0	0	0	0	0	0	0	0
Oleic Acid M0	73125.5	112607	95412.6	166143	106664	88371.4	7563.6	7376.06
Oleic Acid M1	17972.8	29183.2	25013.7	45059.8	28417.1	23568.4	2201.81	2162.38
Oleic Acid M2	5635.46	8117.65	7209.92	11379.1	7986.95	6428.6	0	0
Oleic Acid M3	1126.29	948.12	1223.86	1726.12	1664.37	1488.46	0	0
Oleic Acid M4	377.497	0	0	983.739	781.357	614.26	0	0
Oleic Acid M5	0	0	0	0	0	0	0	0
Oleic Acid M6	0	0	0	0	0	0	0	0
Oleic Acid M7	0	0	0	0	0	0	0	0
Oleic Acid M8	0	0	0	0	0	0	0	0
Oleic Acid M9	0	0	0	0	0	0	0	0
Oleic Acid M10	0	0	0	0	0	0	0	0
Oleic Acid M11	0	0	0	0	0	0	0	0
Oleic Acid M12	0	0	0	0	0	0	0	0
Oleic Acid M13	0	0	0	0	0	0	0	0
Oleic Acid M14	0	0	0	0	0	0	0	0
Oleic Acid M15	0	0	0	0	0	0	0	0
Oleic Acid M16	0	0	0	196.201	0	358.555	0	0
Oleic Acid M17	492.451	0	676.426	896.935	0	273.518	0	0
Oleic Acid M18	0	0	0	0	0	0	0	0
Linoelaidic M0 337,129,379	0	0	0	0	0	0	0	0
Linoelaidic M1	0	0	0	0	0	0	0	0
Linoelaidic M2	0	0	0	0	0	0	104.244	0
Linoelaidic M3	0	0	0	0	0	0	0	0
Linoelaidic M4	0	0	0	0	0	0	0	0
Linoelaidic M5	1026.15	1291.11	151.142	1969.34	1963.12	208.291	0	0
Linoelaidic M6	153.075	126.39	0	1126.69	876.52	614.26	0	0
Palmitelaidic acid M+0 311, 129,353	0	0	0	0	0	0	0	0
Palmitelaidic acid M+1	0	0	0	0	0	0	81.4415	354.662
Palmitelaidic acid M+2	0	0	0	0	0	0	0	0
Palmitelaidic acid M+3	0	0	0	0	0	0	0	0
Palmitelaidic acid M+4	0	0	0	0	0	0	0	0
Palmitelaidic acid M+5	0	0	0	0	0	0	0	0
Palmitelaidic acid M+6	0	0	0	0	0	0	0	0
Palmitelaidic acid M+7	0	0	0	0	0	0	0	0
Palmitelaidic acid M+8	0	0	0	0	0	0	0	0
Palmitelaidic acid M+9	0	0	0	0	0	0	0	0
Palmitelaidic acid M+10	0	0	0	0	0	0	0	0
Palmitelaidic acid M+11	0	0	0	0	0	0	0	0
Palmitelaidic acid M+12	0	0	0	0	0	0	0	0
Palmitelaidic acid M+13	0	0	0	0	0	0	0	0
Palmitelaidic acid M+14	0	0	0	0	0	0	0	0
Palmitelaidic acid M+15	0	0	0	0	0	0	0	0
Palmitelaidic acid M+16	0	0	0	0	0	0	0	0
Myristic M+0 (285,129,327)	34873.9	58109	45248.9	57560.3	42050.9	41310.9	8612.11	9004.46
Myristic M+1	7759.38	13487.9	10706.3	13212.2	9047.32	10223.1	1803.3	2497.41
Myristic M+2	2203.36	5216.18	4643.27	4747.97	4145.35	4002.43	397.372	490.987
Myristic M+3	397.007	1318.52	834.513	705.259	348.727	840.809	0	0
Myristic M+4	0	0	0	0	0	0	0	0
Myristic M+5	0	0	0	0	0	0	0	0
Myristic M+6	0	0	0	0	0	0	0	0
Myristic M+7	0	0	0	0	0	0	0	0
Myristic M+8	0	0	0	0	0	0	0	0
Myristic M+9	0	0	0	0	0	0	0	0
Myristic M+10	0	0	0	0	0	0	0	0
Myristic M+11	0	0	0	0	0	0	0	0
Myristic M+12	0	0	0	0	0	0	0	0
Myristic M+13	0	0	0	0	0	0	0	0
Myristic M+14	0	0	0	0	0	0	0	0
Glucose 3 M+0	5895.4	14081.6	11935.3	18421.7	9357.5	12995.8	0	0
Glucose 3 M+1	3607.45	8427.56	6598.93	9699.54	4152.6	7196.21	0	0
Glucose 3 M+2	1517.65	4223.72	3713.28	5196.92	1967.25	3673.34	0	0
Glucose 3 M+3	588.247	1606.37	1098.51	1281.89	750.653	1205.64	0	0
Glucose 3 M+4	109.105	341.44	460.987	450.472	155.021	235.441	0	0
Glucose 3 M+5	0	0	0	163.512	0	0	0	0
Glucose 3 M+6	0	0	0	0	0	0	0	0
Urea 3-TBDMS (?)	0	345.053	178.555	262.815	0	0	0	0
Urea 3 M+1	0	0	0	0	0	0	0	0
Urea 3 M+2	0	0	0	0	0	0	0	0
Urea 3 M+3	0	0	0	0	0	0	0	0
Aminoadipic 3TBDMS ?	1195.91	2071.81	1838.96	2144.25	1453.9	2010.26	0	0
aminoadipic M+1	453.61	165.115	99.43	778.617	702.912	705.256	0	0
aminoadipic M+2	243.996	271.291	162.816	108.391	103.896	342.309	0	0
aminoadipic M+3	0	77.8595	0	0	0	0	0	0
aminoadipic M+4	0	0	0	0	0	0	0	0
aminoadipic M+5	0	0	0	0	0	0	0	0
aminoadipic M+6	14810.6	22715.2	20619.6	25301	14121.3	19802.7	0	0
Glycolic Acid (247,189) ?	2718.75	4707.95	4418.96	4299.11	3573.41	3312.29	542.969	910.934
Glycolic M+1	665.787	1004.3	962.036	859.416	460.135	550.108	0	88.998
Glycolic M+2	310.755	494.108	188.595	326.337	252.668	307.867	0	0
Propylene glycol 2TBDMS 247,189 ?	1076.85	2823.22	2720.3	4894.44	1692.05	2534.29	0	0
Propylene glycol M+1	216.212	593.345	377.399	1230.38	511.647	598.665	0	0
Propylene glycol M+2	0	355.62	210.711	280.96	0	191.245	0	0
Propylene glycol M+3	0	0	0	0	0	0	0	0
Ethanolamine (232,144)	71254.7	100044	91887.1	96709.6	92013.1	87063.1	76688.1	104402
EThanolamine M+1	6592.18	9249.26	7932.98	8175.98	7997.27	7738.65	6895.84	9736.36
Ethanolamine M+2	14539.3	21105.5	19388.8	21060.1	19746.2	18275.5	17639	23500.6
Creatinine (284,341)	0	0	0	0	0	0	0	0
Creatinine M+1	0	0	0	0	0	0	0	0
Creatinine M+2	0	0	0	0	0	0	0	0
Creatinine M+3	0	0	0	0	0	0	0	0
Typtophan 3TBDMS 489 531 244	4400.2	8728.59	7711.36	10370.5	6758.39	7751.17	0	0
Tryptophan M+1	2277.43	4268.57	3369.67	4770.48	2869.79	2924.46	0	0
Tryptophan M+2	930.829	1473.02	1636.69	2363.96	1043.08	1112.87	0	0
Tryptophan M+3	153.717	371.973	316.512	480.813	210.009	449.009	0	0
Tryptophan M+4	0	74.002	0	142.569	0	32.9851	0	0
Tryptophan M+5	0	0	0	0	0	0	0	0
Tryptophan M+6	0	0	0	0	0	0	0	0

## Sheet: SIM raw data
SIM DATA	1 MDA CD73pos	2 MDA CD73pos	3 MDA CD73pos	4 MDA CD73neg	5 MDA CD73neg	6 MDA CD73neg	blank	blank
Name	Area	Area	Area	Area	Area	Area	Area	Area
Myristic-D27 ISTD	4.52472e+06	4.01471e+06	4.78468e+06	4.31799e+06	4.07048e+06	4.65817e+06	642.28	394.336
Pyruvic (174,115)	689414	746896	719284	1.13261e+06	817990	870023	7570.9	7804.67
Pyruvic M+1	84617.4	92008.8	88508.6	139613	100301	107428	982.199	1006.15
Pyruvic M+2	31913.6	34549.7	33450.9	52554.7	37822.3	40493.3	316.541	314.835
Pyruvic M+3	5766.51	6435.15	6580.83	7690.12	6564.81	7885.36	67.8997	0
Alanine (260,232)	868078	964374	1.01755e+06	831817	757194	817017	825.075	757.418
Alanine m+1	208082	230350	243501	198735	181077	194950	208.912	167.1
Alanine m+2	87376.7	97151.7	102519	82717	75385.7	81328.9	79.0072	71.6533
Alanine m+3	27850.6	30957	32953	22301	20891.7	22453.6	198.712	235.087
Glycine (246,218)	3.03838e+06	3.29087e+06	3.14874e+06	4.07548e+06	3.69114e+06	3.35558e+06	5298.82	5543.35
Glycine m+1	680941	730449	702556	908623	825043	747268	1237.35	1235.83
Glycine m+2	292036	318823	303050	398330	358434	324211	509.5	539.807
Leucine (302,274)	2.25557e+06	2.51701e+06	2.70391e+06	2.81169e+06	2.18713e+06	2.71256e+06	1889.46	1947.49
Leucine M+1	610438	683866	734435	764255	591167	738581	540.713	572.591
Leucine M+2	234997	263757	283351	294427	227640	284363	208.765	217.255
Leucine M+3	41817.2	47280.9	50740.9	52660.6	40681	50845.7	147.802	165.26
Leucine M+4	7120.81	8167.05	8683.17	8942	6984.04	8654.04	46.0549	69.7864
Leucine M+5	862.182	1027.44	1058.12	1089.52	879.09	1063.39	17.8942	19.7526
Leucine M+6	83.4267	111.784	114.052	133.961	94.0721	104.661	0	0
Leucine M+7	166.183	156.745	195.639	291.777	173.143	161.992	0	0
Isoleucine (302,274)	2.85938e+06	3.14124e+06	3.40818e+06	3.57464e+06	2.75019e+06	3.44958e+06	1491.13	1289.17
Isoleucine M+1	769908	851002	923304	972813	740021	935366	399.839	344.181
Isoleucine M+2	298101	329605	357062	376845	285972	362014	175.358	176.959
Isoleucine M+3	52444.2	58418.8	62807.5	66651.2	50227.7	63646.1	0	0
Isoleucine M+4	8857.01	9890.02	10656	11348.1	8513.77	10816.8	0	0
Isoleucine M+5	1013.37	1141.8	1260.29	1240.34	979.011	1237.99	0	0
Isoleucine M+6	85.7333	107.429	119.732	124.757	103.439	140.49	0	0
Isoleucine M+7	0	34.133	0	47.1246	0	36.8021	0	0
Succinic (289,331)	123331	132004	143747	181251	150031	169286	2419.17	2825.56
Succinic +1	41087.4	43542.8	47625.1	64223.9	53723.9	61026.6	576.869	663.392
Succinic +2	69680.6	74812.5	81135.1	118397	99391.1	112996	274.765	314.611
Succinic +3	27394.2	28008.7	30762.8	43324.1	35123.8	41137.6	53.8644	75.1288
Succinic +4	322558	323899	350911	522090	404167	482117	170.153	161.777
Proline (286,258)	515694	745034	573184	799465	894966	608111	8682.34	13390
Proline M+1	136585	197689	151285	215849	241943	164530	0	0
Proline M+2	66917.6	97229.7	74527.4	110925	123667	84484.3	0	0
Proline M+3	72353	100835	77040.1	140226	151602	106602	0	0
Proline M+4	32450.2	45126.5	33486.8	60395	64785.5	45209.8	0	0
Proline M+5	422019	563704	435061	752761	766984	551012	0	0
Proline M+6	81845.4	110644	85297	148062	150728	107947	0	0
Fumaric (287,329)	565375	627387	715521	613223	494459	579474	1157.77	1278.5
Fumaric M+1	162740	181185	207330	181007	147208	173975	272.138	352.802
Fumaric M+2	153243	166482	192430	183192	149196	181692	177.65	175.399
Fumaric M+3	147743	153241	178603	174125	137864	172022	77.4154	78.5264
Fumaric M+4	462122	469569	545480	550069	420816	533806	0	0
Taurine	3.21423e+06	3.88711e+06	3.34081e+06	3.62948e+06	3.59334e+06	2.94104e+06	5207.67	6154.44
Taurine M+1	696579	867201	723035	768009	773095	642579	3380.17	3659.86
Taurine M+2	437231	509259	429156	476256	456821	390348	0	0
Pyroglutamic (300,272)	1.57606e+06	2.02104e+06	1.94692e+06	2.35598e+06	1.75891e+06	1.90513e+06	6030.24	6875.4
Pyroglutamic M+1	442552	565281	544122	662899	496485	543364	1469	1753.44
Pyroglutamic M+2	240416	305460	298376	358598	271542	304137	655.862	824.147
Pyroglutamic M+3	333038	395373	401924	499460	377642	449982	427.165	498.784
Pyroglutamic M+4	193407	220762	220979	274075	198422	242725	209.621	215.993
Pyroglutamic M+5	3.02988e+06	3.37827e+06	3.32336e+06	4.17032e+06	2.91191e+06	3.61451e+06	0	0
Pyroglutamic M+6	619062	686313	678036	860393	593172	740697	0	0
Methionine (320,292)	390654	414719	443718	479454	374635	444933	0	0
Methionine M+1	100404	107235	113945	123341	95607.2	114336	0	0
Methionine M+2	57638.6	61421.5	65209.9	70709.3	55283	65367.8	0	112.526
Methionine M+3	10955.7	11732.8	12642.2	13679	10516.7	12569.9	0	0
Methionine M+4	2902.4	3178.94	3434.48	3602.5	2884.19	3244.25	0	0
Methionine M+5	579.362	685.681	641.206	654.767	533.947	584.779	0	0
Methionine M+6	150.764	134.732	139.144	135.875	142.036	131.357	0	0
Serine (390,362)	1.86987e+06	2.15811e+06	1.98938e+06	2.35028e+06	1.61351e+06	1.73202e+06	799.013	762.215
Serine m+1	653636	757526	694618	825794	562371	602521	301.81	260.571
Serine m+2	303869	353194	323432	385391	261899	280892	120.324	116.632
Serine m+3	69636.2	80671	73573.9	88007.8	59490.4	64160.6	52.3467	47.1378
Serine M+4	16139.7	18837.7	17022.6	20323.8	13687.4	14909.2	0	0
aketoglutarate (346,258)	166556	192256	208633	255992	208697	264367	37.8501	0
aketoglutarate m+1	57022.8	65481.6	71808.6	91831.5	75518.8	95831.8	0	0
aketoglutarate m+2	41610.4	47081.2	51497.4	67860.9	55279	69353.1	0	0
aketoglutarate m+3	109235	120297	131083	191639	147345	194690	0	0
aketoglutarate m+4	51082.3	54985.7	60170.1	85896.4	63481.7	85242.1	0	0
aketoglutarate m+5	663071	689068	754462	1.05971e+06	754735	1.03308e+06	0	0
Threonine (404,376)	3.5852e+06	4.27004e+06	4.26885e+06	5.25159e+06	3.93596e+06	4.21894e+06	0	0
Threonine M+1	1.31361e+06	1.57781e+06	1.575e+06	1.94934e+06	1.44469e+06	1.55257e+06	0	0
Threonine M+2	608598	735188	731217	908539	670885	719967	0	0
Threonine M+3	142185	172023	170818	212923	156745	167957	0	0
Threonine M+4	33073.6	39954.8	39649.6	49319.5	36182.1	38617.5	0	0
Threonine M+5	5184.68	6306.51	6205.66	7681.82	5705.65	6105.02	0	0
Phenylalanine (336,308)	991209	1.06894e+06	1.14021e+06	1.27509e+06	973471	1.20904e+06	174.795	162.731
Phenylalanine M+1	291390	315245	334285	375195	286063	353996	0	0
Phenylalanine M+2	108405	118038	125775	140951	106694	133266	14.0079	21.3259
Phenylalanine M+3	20264	22540.2	23462.2	26790.6	19794.6	24707.5	30.6303	0
Phenylalanine M+4	3641.96	4008.66	4103.5	4654.59	3611.91	4369.84	0	0
Phenylalanine M+5	585.084	569.392	793.8	885.661	601.633	764.175	0	0
Phenylalanine M+6	332.284	281.209	373.887	395.146	297.04	428.316	0	0
Phenylalanine M+7	0	0	0	0	0	0	0	0
Phenylalanine M+8	0	0	0	0	0	0	0	0
Phenylalanine M+9	0	0	0	0	0	0	0	0
Phenylalanine M+10	0	0	0	0	0	0	0	0
Malic (419,287)	1.08021e+06	1.2806e+06	1.42646e+06	1.21615e+06	978607	1.30903e+06	113.341	72.6114
Malic M+1	452473	542570	602431	527064	424309	571776	49.86	16.3731
Malic m+2	456469	542584	600364	579685	461316	629766	23.3933	22.0983
Malic m+3	459776	529349	589749	585251	450819	630156	0	0
Malic m+4	1.35884e+06	1.52565e+06	1.68624e+06	1.75045e+06	1.29681e+06	1.83607e+06	0	0
Aspartic (418,390)	833584	1.07428e+06	960514	636708	580236	560769	156.259	132.074
Aspartic M+1	353855	461022	412553	278629	254837	246234	59.6984	50.2805
Aspartic M+2	356529	460277	410651	301595	273735	266734	0	1.89991
Aspartic M+3	342386	426611	381550	295087	257862	260133	14.0268	15.5835
AsparticM+4	1.01834e+06	1.23315e+06	1.10592e+06	881041	740980	749619	18.1424	0
Aspartic M+5	328099	398282	357014	285090	237520	241205	0	0
Hydroxyproline (416,388)	14108.1	15889.8	15506.5	22233	15509.9	17146.2	46.3982	12.4406
Hydroxyproline M+1	5119.67	5850.13	5775.6	8349.62	5714.39	6294.98	0	0
Hydroxyproline M+2	2279.96	2732.9	2472.44	3636	2374.41	2727.37	4.46218	0
Hydroxyproline M+3	669.326	587.07	643.847	807.499	590.512	683.183	0	0
Hydroxyproline M+4	0	0	0	0	0	0	0	0
Hydroxyproline M+5	100.519	183.585	165.378	150.744	130.965	117.899	0	0
Hydroxyproline M+6	0	0	0	0	0	0	0	0
Cysteine (406,378)	1.11815e+06	1.18593e+06	1.12284e+06	1.31097e+06	1.14064e+06	1.39428e+06	34.9104	20.9028
Cysteine M+1	395318	419690	396069	463520	403243	494806	0	0
Cysteine M+2	230001	244136	230925	270123	235905	288749	0	0
Cysteine M+3	57950.5	61915.9	58309.3	68770.1	59997.9	73535.6	0	0
Cysteine M+4	17265.5	18474.5	17252.2	20559.1	17865.8	21709.2	0	0
2-hydroxyglutaric (433,245)	27284.4	28923.5	33888	39918.4	29762.3	39024	0	0
2-hydroxyglutaric M+1	11167.6	11990.2	14021	16775	12710.6	16506.3	0	0
2-hydroxyglutaric M+2	6663.7	7138.48	8013.98	10117.7	8172.09	10194.3	0	0
2-hydroxyglutaric M+3	8331.25	9530.56	10537.6	15595.4	13085.7	16317.2	0	0
2-Hydroxyglutaric M+4	4442.79	5008.36	5432.15	8115.42	6702.9	8481.7	0	0
2-hydroxyglutaric M+5	44476.6	47954.5	52554.3	77080.8	61574.9	78576.4	0	0
Phosphoenolpyruvic (453,495)	1406.63	1988.1	1331.17	1559.65	1979.18	1014.22	0	0
Phosphoenolpyruvic m+1	476.115	664.975	457.092	532.432	685.853	341.063	0	0
Phosphoenolpyruvic m+2	198.034	346.129	247.97	267.632	360.123	184.625	9.34963	0
Phosphoenolpyruvic m+3	44.5245	89.4783	79.0438	74.196	107.969	39.1719	0	2.79815
Asparagine (417,302)	10958.2	17328.7	14090	13345.1	14685.6	11575.3	99.0252	127.747
Asparagine M+1	4371.96	6356.64	4532.14	4867.48	5553.32	4304.3	36.2536	18.5377
Asparagine M+2	2742.91	4523.86	3345.75	3415.1	4172.63	3202.99	10.6451	0
Asparagine M+3	2170.44	3429.41	2608.34	2766.25	3109.11	2452.89	0	0
Asparagine M+4	6205.22	9070.35	7269.81	8484.05	8490.58	7210.77	0	0
Asparagine M+5	1972.72	2796.74	2386.11	2767.54	2738.74	2306.35	0	0
Asparagine M+6	896.731	1369.84	1040.33	1242.68	1182.11	1024.3	0	0
Asparagine M+7	180.198	280.703	224.862	288.349	267.224	224.432	0	0
Glyceraldehyde-3P (484,457,425)	45094.6	51283.1	46894.7	83296.8	32155.5	46325.4	0	0
Glyceraldehyde-3P M+1	16198.4	18175.8	16872.2	29930.8	11332.3	16461.9	0	0
Glyceraldehyde-3P M+2	7651.42	8667.96	7891.18	14026.2	5464.32	7832.87	37.4274	25.2786
Glyceraldehyde-3P M+3	1867.84	2046.89	1894	3406.47	1272.33	1886.58	20.4454	14.3415
Homocysteine (420,392)	1482.43	2427.61	1942.68	2441.49	2655.64	2927.26	0	0
Homocysteine M+1	389.696	550.04	558.536	744.697	881.267	835.395	12.1462	0
Homocysteine M+2	238.81	419.441	321.624	407.861	502.479	475.675	8.18846	12.9899
Homocysteine M+3	50.6934	140.081	103.456	96.7687	139.38	159.164	0	0
Homocysteine M+4	0	0	0	0	0	0	0	0
DHAP 1/2 (484,452,383)	726121	771118	820314	902537	613892	828119	0	0
DHAP 1/2 M+1	259237	276465	294216	322952	219582	294890	0	0
DHAP 1/2 M+2	124149	131577	140831	154684	104434	141382	1.66502	0
DHAP 1/2 M+3	29903.6	31263.7	33785.4	36769.5	24988	33633.4	0	0
DHAP 2/2 (484,452,383)	544519	585449	624503	681131	460107	619498	34.5514	28.9478
DHAP 2/2 M+1	194656	208614	221716	243891	163243	222129	0	0
DHAP 2/2 M+2	93045.2	99977.6	106817	116562	78569.3	105977	0	0
DHAP 2/2 M+3	22306.1	24140.5	25402	27736.8	19071.5	25193.9	0	0
Lysine (431,488)	11272.5	14933.6	10539.1	12075.5	12724.2	9846.35	1869.12	1907.41
Lysine M+1	4057.76	5888.96	4118.8	4635.51	4770.96	3818.86	547.457	679.85
Lysine M+2	2245.22	3091.49	2322.63	2217.81	2452.16	1715.1	219.048	214.733
Lysine M+3	615.137	789.779	607.498	679.086	694.773	491.041	58.2809	32.5152
Lysine M+4	209.232	287.134	178.509	143.186	186.588	125.815	0	0
Lysine M+5	47.5645	0	0	0	0	0	0	0
Lysine M+6	0	0	0	0	0	0	0	0
Lysine M+7	0	0	0	0	0	0	0	0
Lysine M+8	0	0	0	0	0	0	0	0
Cis-aconitic (459,327)	7785.45	10089.1	11596.5	11371.3	8619.88	9505.46	360.96	321.203
Cis-aconitic M +1	3648.83	4630.62	5215.51	5450.63	4038.37	4698.42	153.55	156.985
Cis-aconitic M+2	4359.89	5809.94	5795.99	5665.26	4704.29	4949.79	470.988	471.75
Cis-aconitic M+3	3522.69	4680.23	5012.64	5260.74	4289.47	4645.08	240.185	187.024
Cis-aconitic M+4	7260.41	8957.23	9942.98	11157.5	8279.66	9656.26	165.563	140.272
Cis-Aconitic M+5	5401.63	6616.91	7715.99	8907.33	6410.67	7761.83	29.0959	50.8188
Cis-aconitic M+6	2245.95	2727.01	3017.14	3435.7	2541.88	2966	0	0
2-phosphoGlycertate (585,383)	434.554	549.474	445.156	752.902	560.76	514.8	0	0
2-phosphoglycerate M+1	179.516	227.045	198.459	334.317	240.514	208.073	0	0
2-phosphoglycerate M+2	118.668	123.454	115.313	209.499	143.946	136.915	0	0
2-phosphoglycerate M+3	0	39.496	0	52.8553	19.013	50.7699	0	0
Histidine (440,338)	47940	91755.7	49440.6	54571.2	68275.4	44702.6	36.2051	34.509
Histidine M+1	17614.3	32810.2	17698.6	19681.1	23696.9	16710.2	61.3746	41.5691
Histidine M+2	7532.52	14654.4	7359.57	8426.3	11658.2	7153.01	0	0
Histidine M+3	2975.78	4627.83	3568.26	2636.31	3391.41	2364.92	5.79273	0
Histidine M+4	908.862	1152.05	720.135	875.827	916.572	809.553	0	0
Histidine M+5	0	0	0	0	0	0	0	0
Histidine M+6	0	0	0	0	0	0	0	0
Histidine M+7	0	0	0	0	0	0	0	0
Histidine M+8	0	0	0	0	0	0	0	0
Citric (459,431)	506786	651790	680535	639522	503634	667149	119.097	71.6004
Citric m+1 (460,432)	232954	302047	317478	295545	238510	318118	32.2934	32.8447
Citric m+2 (461,433)	233861	299759	314096	299205	248417	332690	40.1013	14.9109
Citric m+3 (462,434)	221039	277250	289743	287142	239845	325753	16.1845	0
Citric m+4 (463,435)	516716	626448	651310	667554	532061	739612	41.1292	0
Citric m+5 (464,436)	353422	430232	448336	469521	379245	519541	25.0956	3.22957
Citric m+6 (465, 437)	151285	182174	189410	194255	155200	211833	0	0
3-phosphoglycerate (585,383)	3703.25	4433.91	3663.07	3449.07	4448.18	3658.95	0	0
3-phosphoglycerate M+1	1597.22	2050.65	1727.56	1601.51	1937.12	1626.82	0	3.15289
3-phosphoglycerate M+2	997.944	1183.5	1117.42	1003.68	1207.99	951.621	0	0
3-phosphoglycerate M+3	249.192	347.732	271.549	267.42	318.849	292.121	0	0
Isocitric (459,431)	6185.43	7173.07	7815.29	7123.77	6256.1	7845.99	73.7855	16.6465
Isocitric m+1 (460,432)	2632.65	3239.31	3106.34	2954.71	2707.56	3498.34	0	0
Isocitric m+2 (461,433)	2603.23	3075.24	3351.31	3252.41	2964.89	3637.08	0	0
Isocitric m+3 (462,434)	3117.49	3658.9	3950.02	4064.47	3541.25	4507.82	0	0
Isocitric m+4 (463,435)	5247.85	5788.75	6098.99	6474.28	5329.11	7216.33	0	0
Isocitric m+5 (464,436)	5927.15	6553.72	7357.96	7704.82	6062.92	8474.94	26.072	10.8362
Isocitric m+6 (465, 437)	4044.99	4016.51	4343.74	4238.48	3600.73	5454.85	0	21.1157
Tyrosine (466,302)	3.33979e+06	3.90882e+06	4.00701e+06	4.74807e+06	3.30519e+06	4.33675e+06	0	0
Tyrosine M+1	342689	401875	411484	489473	338407	447849	0	28.1211
Tyrosine M+2	153349	180647	185784	220064	152565	200716	0	0
Tyrosine M+3	43035.7	49960.5	52029.3	60927.7	43065	55872.8	0	0
Tyrosine M+4	10041.8	12095.4	12451.6	14397.4	10238.9	13553.6	44.4117	0
Tyrosine M+5	0	0	0	0	0	0	0	0
Phosphoserine (584,482)	498.626	497.168	646.554	682.276	371.084	426.436	0	0
Phosphoserine M+1	317.339	256.433	360.695	411.527	162.685	206.921	0	0
Phosphoserine M+2	120.12	156.063	175.875	148.856	87.1735	101.451	2.18371	2.69532
Phosphoserine M+3	0	0	0	0	0	0	0	0
Phosphoserine M+4	0	0	0	0	0	0	0	0
GABA M+0	150853	151648	164775	157229	112393	131120	66.028	86.0151
GABA M+1	35658.5	36027.8	39331.3	37615.5	26905.2	30836.6	20.3224	28.1756
GABA M+2	14757.4	15152.1	16584.2	15714.6	11496.2	13315.6	0	1.72706
GABA M+3	2647.93	2774.26	3023.48	2849.75	2151.25	2419.14	0	0
GABA M+4	5439.52	5963.02	6653.23	5859.58	5069.77	5643.33	0	0
b-alanine M+0	1.0268e+06	1.07399e+06	1.15e+06	1.14872e+06	923021	1.00783e+06	91.798	91.9415
b-alanine M+1	242015	251391	270226	268787	217408	236389	0	0
b-alanine M+2	97795.1	102419	109936	109340	88165.7	96088.1	0	0
b-alanine M+3	14848.2	15318.6	16670.2	16675	13586.1	14609.1	0	0
b-alanine M+4	2630.96	2604.59	2816.84	2908.22	2256.58	2587.46	0	0

## Sheet: Diluted Scan raw data
Diluted SCAN data	1 MDA CD73pos, 1:9 dilution	1 MDA CD73pos, 1:14 dilution	2 MDA CD73pos, 1:14 dilution	3 MDA CD73pos, 1:14 dilution	4 MDA CD73neg, 1:14 dilution	5 MDA CD73neg, 1:9 dilution	5 MDA CD73neg, 1:14 dilution	6 MDA CD73neg, 1:14 dilution	MTBSTFA + Mox	MTBSTFA + Mox
Name	Area	Area	Area	Area	Area	Area	Area	Area	Area	Area
Myristic-D27 ISTD	60276.1	40903.6	50601.1	54358.8	56492.5	70935.8	46436.3	55614.6	0	91.8535
Lactic (261,233)	447975	297868	414548	430971	569902	664430	393248	513339	65358.5	50381.6
Lactic M+1	100036	68437.5	93262.2	96876.5	132348	149093	87917.4	114561	15124.5	11733.7
Lactic M+2	42573.9	28051.9	39761.8	40604.3	51788.8	62464.8	38229.4	48810.6	6843.26	5003.52
Lactic M+3	7513.75	5293.78	7311.21	7293.6	9887.33	11436	6368.36	8816.94	131.475	438.398
Glycine (246,218)	52915.9	38805.1	56524.5	50581.3	71020.7	82804.1	52895.4	53844.9	695.362	253.337
Glycine m+1	10986.4	8049.19	12087.4	11535.9	15288.3	17147.7	11454.7	11948.3	315.178	113.34
Glycine m+2	4681.18	3038.51	5244.57	4454.26	6302.99	7672.36	5087.64	4704.4	0	0
Taurine	14967	9440.32	29541.5	17501.9	27445.4	28967.9	15640.6	17081.8	0	0
Taurine M+1	3146.34	1450.21	6373.64	3231.2	5031.53	6247.75	3473.01	3771.38	0	0
Taurine M+2	1840.16	1145.47	3329.14	2273.94	2951.78	3560.45	2182.62	2978.65	0	0
Glutamic (432,330)	251822	148113	239732	226386	262723	388701	165611	197172	0	0
Glutamic m+1	114524	68081.9	110015	102314	123647	182034	76995.6	92775.6	0	0
Glutamic m+2	86240.4	50242.5	81190.5	75539	94478.6	139026	59759.1	69760.5	0	0
Glutamic m+3	180218	103080	162727	155350	210663	294029	124608	150036	0	0
Glutamic m+4	100526	56681.7	88857.4	81819.1	112909	151817	65381.9	79140.7	0	0
Glutamic m+5	962182	572992	836597	804616	1.05275e+06	1.35478e+06	592979	733266	393.422	174.541
Glutamic M+6	299205	177518	256481	252052	326769	416656	181824	228313	0	0
Glutamine (431,329)	2190.62	1318.72	2666.68	1784	1787.39	3264.94	1892.4	1389.54	0	0
Glutamine M+1	908.804	448.432	766.55	622.323	1165.87	1623.51	964.312	810.728	0	0
Glutamine M+2	479.935	418.4	888.762	313.392	506.408	1190.72	612.39	195.715	0	0
Glutamine M+3	273.019	190.818	249.333	314.341	778.871	914.32	674.412	313.043	0	0
Glutamine M+4	5076.87	3442.88	5506.74	5369.33	6491.47	9400.84	4222.97	4472.26	0	0
Glutamine M+5	141287	91218.7	158127	122769	171324	252646	124959	116822	79.422	0
Glutamine M+6	44266.5	27624	47721.2	39294	54038.5	80971.3	38750.2	36095.9	0	0
Glutamine M+7	22690.6	13292.6	22665.3	17717.2	24518.8	36385.4	18753.1	16311.7	0	0

## Sheet: DHAP -SIM
SIM	1 MDA CD73pos	2 MDA CD73pos	3 MDA CD73pos	4 MDA CD73neg	5 MDA CD73neg	6 MDA CD73neg	blank	blank		DHAP / 3P-Glyceraldehyde
DHAP 1/2 (484,452,383)	726121	771118	820314	902537	613892	828119	0	0		1.58572	0	0	0
DHAP 1/2 M+1	259237	276465	294216	322952	219582	294890	0	0		-0.56998	1.58572	0	0
DHAP 1/2 M+2	124149	131577	140831	154684	104434	141382	1.66502	0		-0.0685347	-0.56998	1.58572	0
DHAP 1/2 M+3	29903.6	31263.7	33785.4	36769.5	24988	33633.4	0	0		0.0570553	-0.0685347	-0.56998	1.58572
DHAP 2/2 (484,452,383)	544519	585449	624503	681131	460107	619498	34.5514	28.9478
DHAP 2/2 M+1	194656	208614	221716	243891	163243	222129	0	0
DHAP 2/2 M+2	93045.2	99977.6	106817	116562	78569.3	105977	0	0
DHAP 2/2 M+3	22306.1	24140.5	25402	27736.8	19071.5	25193.9	0	0
Sum 1 of 2	1.13941e+06	1.21042e+06	1.28915e+06	1.41694e+06	962895	1.29802e+06	1.66502	0
Sum 2 of 2	854527	918182	978438	1.06932e+06	720990	972797	34.5514	28.9478
normalize 1 of 2
DHAP 1/2 (484,452,383)	0.637278	0.637065	0.636323	0.636961	0.637548	0.637984	0	#DIV/0!
DHAP 1/2 M+1	0.227518	0.228404	0.228225	0.227922	0.228043	0.227184	0	#DIV/0!
DHAP 1/2 M+2	0.108959	0.108703	0.109244	0.109168	0.108458	0.108921	1	#DIV/0!
DHAP 1/2 M+3	0.0262448	0.0258287	0.0262075	0.0259499	0.0259509	0.0259112	0	#DIV/0!
normalize 2 of 2
DHAP 2/2 (484,452,383)	0.637217	0.637618	0.638265	0.636975	0.63816	0.636821	1	1
DHAP 2/2 M+1	0.227794	0.227204	0.226602	0.22808	0.226414	0.22834	0	0
DHAP 2/2 M+2	0.108885	0.108886	0.109171	0.109006	0.108974	0.10894	0	0
DHAP 2/2 M+3	0.0261034	0.0262916	0.0259618	0.0259387	0.0264518	0.0258984	0	0
Matrix correct 1 of 2
DHAP 1/2 (484,452,383)	1.01054	1.0102	1.00903	1.01004	1.01097	1.01166	0	#DIV/0!
DHAP 1/2 M+1	-0.00245548	-0.000930481	-0.000790948	-0.00163494	-0.00177726	-0.00338838	0	#DIV/0!
DHAP 1/2 M+2	-0.000578873	-0.00147416	-0.000463999	-0.000455651	-0.00169008	-0.000496515	1.58572	#DIV/0!
DHAP 1/2 M+3	0.00027972	-0.000307083	-4.47465e-05	-0.000352717	7.83928e-05	-0.000164432	-0.56998	#DIV/0!
matrix correct 2 of 2
DHAP 2/2 (484,452,383)	1.01045	1.01108	1.01211	1.01006	1.01194	1.00982	1.58572	1.58572
DHAP 2/2 M+1	-0.00198343	-0.00314825	-0.00447157	-0.0013923	-0.00470889	-0.000892448	-0.56998	-0.56998
DHAP 2/2 M+2	-0.00084864	-0.00053739	0.000212733	-0.000803229	1.46244e-05	-0.00104488	-0.0685347	-0.0685347
DHAP 2/2 M+3	7.51681e-05	0.000436149	-0.000170854	-0.000288279	0.000725154	-0.000341384	0.0570553	0.0570553
Remove neg
DHAP 1/2 (484,452,383)	1.01054	1.0102	1.00903	1.01004	1.01097	1.01166	0	#DIV/0!
DHAP 1/2 M+1	0	0	0	0	0	0	0	#DIV/0!
DHAP 1/2 M+2	0	0	0	0	0	0	1.58572	#DIV/0!
DHAP 1/2 M+3	0.00027972	0	0	0	7.83928e-05	0	0	#DIV/0!
Remove neg
DHAP 2/2 (484,452,383)	1.01045	1.01108	1.01211	1.01006	1.01194	1.00982	1.58572	1.58572
DHAP 2/2 M+1	0	0	0	0	0	0	0	0
DHAP 2/2 M+2	0	0	0.000212733	0	1.46244e-05	0	0	0
DHAP 2/2 M+3	7.51681e-05	0.000436149	0	0	0.000725154	0	0.0570553	0.0570553
re-sum 1/2	1.01082	1.0102	1.00903	1.01004	1.01105	1.01166	1.58572	#DIV/0!
resum 2/2	1.01052	1.01152	1.01232	1.01006	1.01268	1.00982	1.64277	1.64277
renormalize matrix corrected 1/2	1 MDA CD73pos	2 MDA CD73pos	3 MDA CD73pos	4 MDA CD73neg	5 MDA CD73neg	6 MDA CD73neg	blank	blank
DHAP 1/2 (484,452,383)	0.999723	1	1	1	0.999922	1	0	#DIV/0!
DHAP 1/2 M+1	0	0	0	0	0	0	0	#DIV/0!
DHAP 1/2 M+2	0	0	0	0	0	0	1	#DIV/0!
DHAP 1/2 M+3	0.000276725	0	0	0	7.75361e-05	0	0	#DIV/0!
renormalize matrix corrected 2/2	1 MDA CD73pos	2 MDA CD73pos	3 MDA CD73pos	4 MDA CD73neg	5 MDA CD73neg	6 MDA CD73neg	blank	blank
DHAP 2/2 (484,452,383)	0.999926	0.999569	0.99979	1	0.999269	1	0.965269	0.965269
DHAP 2/2 M+1	0	0	0	0	0	0	0	0
DHAP 2/2 M+2	0	0	0.000210144	0	1.44413e-05	0	0	0
DHAP 2/2 M+3	7.43855e-05	0.000431183	0	0	0.000716074	0	0.0347311	0.0347311

## Sheet: GAHP-SIM
SIM DATA	1 MDA CD73pos	2 MDA CD73pos	3 MDA CD73pos	4 MDA CD73neg	5 MDA CD73neg	6 MDA CD73neg	blank	blank		DHAP / 3P-Glyceraldehyde
Glyceraldehyde-3P (484,457,425)	45094.6	51283.1	46894.7	83296.8	32155.5	46325.4	0	0		1.58572	0	0	0
Glyceraldehyde-3P M+1	16198.4	18175.8	16872.2	29930.8	11332.3	16461.9	0	0		-0.56998	1.58572	0	0
Glyceraldehyde-3P M+2	7651.42	8667.96	7891.18	14026.2	5464.32	7832.87	37.4274	25.2786		-0.0685347	-0.56998	1.58572	0
Glyceraldehyde-3P M+3	1867.84	2046.89	1894	3406.47	1272.33	1886.58	20.4454	14.3415		0.0570553	-0.0685347	-0.56998	1.58572
Sum of Ions	70812.2	80173.8	73552.1	130660	50224.4	72506.8	57.8727	39.6202
Normalization
Glyceraldehyde-3P	0.636819	0.639649	0.637571	0.637507	0.640236	0.638912	0	0
Glyceraldehyde-3P M+1	0.228752	0.226705	0.229392	0.229073	0.225633	0.22704	0	0
Glyceraldehyde-3P M+2	0.108052	0.108115	0.107287	0.107349	0.108798	0.108029	0.646719	0.638024
Glyceraldehyde-3P M+3	0.0263773	0.0255307	0.0257504	0.0260712	0.0253329	0.0260194	0.353281	0.361976
Matrix correction
Glyceraldehyde-3P	1.00981	1.0143	1.01101	1.01091	1.01523	1.01313	0	0
Glyceraldehyde-3P M+1	-0.000237862	-0.0050962	0.000347469	-0.000120154	-0.00713223	-0.004146	0	0
Glyceraldehyde-3P M+2	-0.00268778	-0.00161639	-0.00431757	-0.00403417	3.88536e-05	-0.00189141	1.02551	1.01173
Glyceraldehyde-3P M+3	0.000895824	-0.00018056	0.000337055	0.000828732	-0.000776713	0.000578076	0.191588	0.210331
Correct for negative
Glyceraldehyde-3P	1.00981	1.0143	1.01101	1.01091	1.01523	1.01313	0	0
Glyceraldehyde-3P M+1	0	0	0.000347469	0	0	0	0	0
Glyceraldehyde-3P M+2	0	0	0	0	3.88536e-05	0	1.02551	1.01173
Glyceraldehyde-3P M+3	0.000895824	0	0.000337055	0.000828732	0	0.000578076	0.191588	0.210331
Sum for renormalization	1.01071	1.0143	1.01169	1.01173	1.01527	1.01371	1.2171	1.22206
Corrected/Renormalized	1 MDA CD73pos	2 MDA CD73pos	3 MDA CD73pos	4 MDA CD73neg	5 MDA CD73neg	6 MDA CD73neg	blank	blank
Glyceraldehyde-3P	0.999114	1	0.999323	0.999181	0.999962	0.99943	0	0
Glyceraldehyde-3P M+1	0	0	0.000343454	0	0	0	0	0
Glyceraldehyde-3P M+2	0	0	0	0	3.82691e-05	0	0.842587	0.827888
Glyceraldehyde-3P M+3	0.000886332	0	0.00033316	0.00081912	0	0.000570257	0.157413	0.172112

## Sheet: 3PG
SIM DATA	1 MDA CD73pos	2 MDA CD73pos	3 MDA CD73pos	4 MDA CD73neg	5 MDA CD73neg	6 MDA CD73neg	blank	blank		3P-Glycerate
3-phosphoglycerate (585,383)	3703.25	4433.91	3663.07	3449.07	4448.18	3658.95	0	0		1.81504	0	0	0
3-phosphoglycerate M+1	1597.22	2050.65	1727.56	1601.51	1937.12	1626.82	0	3.15289		-0.839711	1.81504	0	0
3-phosphoglycerate M+2	997.944	1183.5	1117.42	1003.68	1207.99	951.621	0	0		-0.0630834	-0.839711	1.81504	0
3-phosphoglycerate M+3	249.192	347.732	271.549	267.42	318.849	292.121	0	0		0.10111	-0.0630834	-0.839711	1.81504
Sum of Ions	6547.61	8015.79	6779.61	6321.68	7912.15	6529.51	0	3.15289
Normalization
3-phosphoglycerate (585,383)	0.565589	0.553147	0.540307	0.545594	0.562197	0.560371	#DIV/0!	0
3-phosphoglycerate M+1	0.243939	0.255826	0.254817	0.253335	0.244829	0.249149	#DIV/0!	1
3-phosphoglycerate M+2	0.152414	0.147646	0.164821	0.158768	0.152676	0.145742	#DIV/0!	0
3-phosphoglycerate M+3	0.0380585	0.0433809	0.0400538	0.042302	0.0402986	0.0447385	#DIV/0!	0
Matrix correction
3-phosphoglycerate (585,383)	1.02657	1.00399	0.980682	0.990277	1.02041	1.0171	#DIV/0!	0
3-phosphoglycerate M+1	-0.0321713	-0.000148862	0.00880235	0.00167328	-0.0277079	-0.0183327	#DIV/0!	1.81504
3-phosphoglycerate M+2	0.0361196	0.018269	0.0511005	0.0410248	0.0360626	0.0199637	#DIV/0!	-0.839711
3-phosphoglycerate M+3	-0.0171075	-0.00545142	-0.0271474	-0.0173559	-0.013661	-0.000236717	#DIV/0!	-0.0630834
Correct for negative
3-phosphoglycerate (585,383)	1.02657	1.00399	0.980682	0.990277	1.02041	1.0171	#DIV/0!	0
3-phosphoglycerate M+1	0	0	0.00880235	0.00167328	0	0	#DIV/0!	1.81504
3-phosphoglycerate M+2	0.0361196	0.018269	0.0511005	0.0410248	0.0360626	0.0199637	#DIV/0!	0
3-phosphoglycerate M+3	0	0	0	0	0	0	#DIV/0!	0
Sum for renormalization	1.06269	1.02226	1.04058	1.03298	1.05647	1.03706	#DIV/0!	1.81504
Corrected/Renormalized	1 MDA CD73pos	2 MDA CD73pos	3 MDA CD73pos	4 MDA CD73neg	5 MDA CD73neg	6 MDA CD73neg	blank	blank
3-phosphoglycerate (585,383)	0.966011	0.982129	0.942433	0.958665	0.965865	0.98075	#DIV/0!	0
3-phosphoglycerate M+1	0	0	0.00845905	0.00161986	0	0	#DIV/0!	1
3-phosphoglycerate M+2	0.0339889	0.0178713	0.0491075	0.0397151	0.0341349	0.0192502	#DIV/0!	0
3-phosphoglycerate M+3	0	0	0	0	0	0	#DIV/0!	0

## Sheet: PEP
SIM DATA	1 MDA CD73pos	2 MDA CD73pos	3 MDA CD73pos	4 MDA CD73neg	5 MDA CD73neg	6 MDA CD73neg	blank	blank		PEP
Phosphoenolpyruvic (453,495)	1406.63	1988.1	1331.17	1559.65	1979.18	1014.22	0	0		1.56181	0	0	0	0
Phosphoenolpyruvic m+1	476.115	664.975	457.092	532.432	685.853	341.063	0	0		-0.537552	1.56181	0	0	0
Phosphoenolpyruvic m+2	198.034	346.129	247.97	267.632	360.123	184.625	9.34963	0		-0.0759879	-0.537552	1.56181	0	0
Phosphoenolpyruvic m+3	44.5245	89.4783	79.0438	74.196	107.969	39.1719	0	2.79815		0.0551363	-0.0759879	-0.537552	1.56181	0
										-0.000399092	0.0551363	-0.0759879	-0.537552	1.56181
Sum of Ions	2125.3	3088.68	2115.28	2433.91	3133.12	1579.08	9.34963	2.79815
Normalization
Pyruvic (174,115)	0.661848	0.643673	0.629313	0.6408	0.631695	0.642286	0	0
Pyruvic M+1	0.224023	0.215294	0.216091	0.218756	0.218904	0.215988	0	0
Pyruvic M+2	0.0931795	0.112064	0.117228	0.10996	0.114941	0.116919	1	0
Pyruvic M+3	0.0209497	0.0289697	0.0373681	0.0304842	0.0344605	0.0248067	0	1
Matrix correction	1 MDA CD73pos	2 MDA CD73pos	3 MDA CD73pos	4 MDA CD73neg	5 MDA CD73neg	6 MDA CD73neg	blank	blank
Pyruvic (174,115)	1.03368	1.00529	0.982864	1.00081	0.986584	1.00312	0	0
Pyruvic M+1	-0.00589835	-0.00976017	-0.000796715	-0.00280994	0.00231616	-0.00793048	0	0
Pyruvic M+2	-0.0251882	0.0103784	0.0191072	0.00544974	0.0138415	0.0176944	1.56181	0
Pyruvic M+3	0.00209943	0.00413499	0.0136231	0.00720999	0.0102292	-0.00510624	-0.537552	1.56181
Correct for negative
Pyruvic (174,115)	1.03368	1.00529	0.982864	1.00081	0.986584	1.00312	0	0
Pyruvic M+1	0	0	0	0	0.00231616	0	0	0
Pyruvic M+2	0	0.0103784	0.0191072	0.00544974	0.0138415	0.0176944	1.56181	0
Pyruvic M+3	0.00209943	0.00413499	0.0136231	0.00720999	0.0102292	0	0	1.56181
Sum for renormalization	1.03578	1.0198	1.01559	1.01347	1.01297	1.02082	1.56181	1.56181
Corrected/Renormalized	1 MDA CD73pos	2 MDA CD73pos	3 MDA CD73pos	4 MDA CD73neg	5 MDA CD73neg	6 MDA CD73neg	blank	blank
Pyruvic (174,115)	0.997973	0.985768	0.967772	0.987508	0.973951	0.982666	0	0
Pyruvic M+1	0	0	0	0	0.0022865	0	0	0
Pyruvic M+2	0	0.0101768	0.0188138	0.00537734	0.0136643	0.0173335	1	0
Pyruvic M+3	0.00202691	0.00405469	0.0134139	0.00711419	0.0100982	0	0	1

## Sheet: Pyruvic
SCAN DATA	1 MDA CD73pos	2 MDA CD73pos	3 MDA CD73pos	4 MDA CD73neg	5 MDA CD73neg	6 MDA CD73neg	blank	blank		Pyruvate
Pyruvic (174,115)	109836	195005	153424	304819	182133	201589	0	0		1.17142	0	0	0
Pyruvic M+1	14573	23489.7	20231.5	38156.8	23685.6	25185.8	0	0		-0.143275	1.17142	0	0
Pyruvic M+2	5630.3	9340.95	8088.12	13783.6	9786.59	9546.22	0	0		-0.0357412	-0.143275	1.17142	0
Pyruvic M+3	706.62	1422.11	1630.05	2320.61	1655.52	2282.47	0	0		0.00702558	-0.0357412	-0.143275	1.17142
Sum of Ions	130746	229258	183374	359080	217261	238603	0	0
Normalization
Pyruvic (174,115)	0.840072	0.850593	0.836674	0.848889	0.838315	0.84487	#DIV/0!	#DIV/0!
Pyruvic M+1	0.111461	0.10246	0.11033	0.106263	0.109019	0.105555	#DIV/0!	#DIV/0!
Pyruvic M+2	0.043063	0.0407443	0.0441073	0.0383859	0.0450453	0.0400087	#DIV/0!	#DIV/0!
Pyruvic M+3	0.00540453	0.00620311	0.00888921	0.00646266	0.00761995	0.00956594	#DIV/0!	#DIV/0!
Matrix correction	1 MDA CD73pos	2 MDA CD73pos	3 MDA CD73pos	4 MDA CD73neg	5 MDA CD73neg	6 MDA CD73neg	blank	blank
Pyruvic (174,115)	0.98408	0.996405	0.980099	0.994408	0.982022	0.989701	#DIV/0!	#DIV/0!
Pyruvic M+1	0.0102061	-0.00184513	0.0093682	0.00285394	0.00759791	0.0026008	#DIV/0!	#DIV/0!
Pyruvic M+2	0.00445024	0.00264771	0.00595712	-0.000598949	0.007185	0.00154706	#DIV/0!	#DIV/0!
Pyruvic M+3	0.0020794	0.00374269	0.00602834	0.00423674	0.00446548	0.00763655	#DIV/0!	#DIV/0!
Correct for negative
Pyruvic (174,115)	0.98408	0.996405	0.980099	0.994408	0.982022	0.989701	#DIV/0!	#DIV/0!
Pyruvic M+1	0.0102061	0	0.0093682	0.00285394	0.00759791	0.0026008	#DIV/0!	#DIV/0!
Pyruvic M+2	0.00445024	0.00264771	0.00595712	0	0.007185	0.00154706	#DIV/0!	#DIV/0!
Pyruvic M+3	0.0020794	0.00374269	0.00602834	0.00423674	0.00446548	0.00763655	#DIV/0!	#DIV/0!
Sum for renormalization	1.00082	1.00279	1.00145	1.0015	1.00127	1.00149	#DIV/0!	#DIV/0!
Corrected/Renormalized	1 MDA CD73pos	2 MDA CD73pos	3 MDA CD73pos	4 MDA CD73neg	5 MDA CD73neg	6 MDA CD73neg	blank	blank
Pyruvic (174,115)	0.983278	0.993627	0.978677	0.99292	0.980776	0.988233	#DIV/0!	#DIV/0!
Pyruvic M+1	0.0101978	0	0.00935461	0.00284967	0.00758827	0.00259694	#DIV/0!	#DIV/0!
Pyruvic M+2	0.00444662	0.00264033	0.00594847	0	0.00717588	0.00154476	#DIV/0!	#DIV/0!
Pyruvic M+3	0.0020777	0.00373226	0.0060196	0.0042304	0.00445981	0.00762522	#DIV/0!	#DIV/0!
SIM DATA	1 MDA CD73pos	2 MDA CD73pos	3 MDA CD73pos	4 MDA CD73neg	5 MDA CD73neg	6 MDA CD73neg	blank	blank		Pyruvate
Pyruvic (174,115)	689414	746896	719284	1.13261e+06	817990	870023	7570.9	7804.67		1.17142	0	0	0
Pyruvic M+1	84617.4	92008.8	88508.6	139613	100301	107428	982.199	1006.15		-0.143275	1.17142	0	0
Pyruvic M+2	31913.6	34549.7	33450.9	52554.7	37822.3	40493.3	316.541	314.835		-0.0357412	-0.143275	1.17142	0
Pyruvic M+3	5766.51	6435.15	6580.83	7690.12	6564.81	7885.36	67.8997	0		0.00702558	-0.0357412	-0.143275	1.17142
Sum of Ions	811711	879890	847824	1.33246e+06	962679	1.02583e+06	8937.54	9125.65
Normalization
Pyruvic (174,115)	0.849334	0.848852	0.848388	0.850009	0.849702	0.848117	0.84709	0.855245
Pyruvic M+1	0.104246	0.104569	0.104395	0.104778	0.10419	0.104723	0.109896	0.110255
Pyruvic M+2	0.0393164	0.039266	0.0394549	0.0394417	0.0392886	0.0394737	0.035417	0.0345
Pyruvic M+3	0.00710415	0.00731358	0.00776202	0.00577135	0.00681931	0.00768682	0.00759714	0
Matrix correction	1 MDA CD73pos	2 MDA CD73pos	3 MDA CD73pos	4 MDA CD73neg	5 MDA CD73neg	6 MDA CD73neg	blank	blank
Pyruvic (174,115)	0.994929	0.994365	0.993822	0.99572	0.995361	0.993504	0.992301	1.00185
Pyruvic M+1	0.000427504	0.000874721	0.000737767	0.000954319	0.000309379	0.00116062	0.00736779	0.00661948
Pyruvic M+2	0.000764143	0.000675998	0.000938798	0.000810506	0.0007264	0.000923495	-0.00453303	-0.00595021
Pyruvic M+3	0.00493009	0.00516773	0.00566892	0.00333659	0.00460499	0.00556452	0.00584857	-0.00287503
Correct for negative
Pyruvic (174,115)	0.994929	0.994365	0.993822	0.99572	0.995361	0.993504	0.992301	1.00185
Pyruvic M+1	0.000427504	0.000874721	0.000737767	0.000954319	0.000309379	0.00116062	0.00736779	0.00661948
Pyruvic M+2	0.000764143	0.000675998	0.000938798	0.000810506	0.0007264	0.000923495	0	0
Pyruvic M+3	0.00493009	0.00516773	0.00566892	0.00333659	0.00460499	0.00556452	0.00584857	0
Sum for renormalization	1.00105	1.00108	1.00117	1.00082	1.001	1.00115	1.00552	1.00847
Corrected/Renormalized	1 MDA CD73pos	2 MDA CD73pos	3 MDA CD73pos	4 MDA CD73neg	5 MDA CD73neg	6 MDA CD73neg	blank	blank
Pyruvic (174,115)	0.993885	0.993289	0.992663	0.994903	0.994365	0.99236	0.986856	0.993436
Pyruvic M+1	0.000427055	0.000873774	0.000736907	0.000953535	0.000309069	0.00115928	0.00732737	0.00656386
Pyruvic M+2	0.000763341	0.000675267	0.000937704	0.00080984	0.000725673	0.000922431	0	0
Pyruvic M+3	0.00492491	0.00516214	0.00566231	0.00333385	0.00460038	0.00555811	0.00581647	0

## Sheet: Lactic
Diluted SCAN data	1 MDA CD73pos, 1:9 dilution	1 MDA CD73pos, 1:14 dilution	2 MDA CD73pos, 1:14 dilution	3 MDA CD73pos, 1:14 dilution	4 MDA CD73neg, 1:14 dilution	5 MDA CD73neg, 1:9 dilution	5 MDA CD73neg, 1:14 dilution	6 MDA CD73neg, 1:14 dilution	blank	blank		Lactate
Lactic (261,233)	447975	297868	414548	430971	569902	664430	393248	513339	65358.5	50381.6		1.33798	0	0	0
Lactic M+1	100036	68437.5	93262.2	96876.5	132348	149093	87917.4	114561	15124.5	11733.7		-0.301609	1.33798	0	0
Lactic M+2	42573.9	28051.9	39761.8	40604.3	51788.8	62464.8	38229.4	48810.6	6843.26	5003.52		-0.0595149	-0.301609	1.33798	0
Lactic M+3	7513.75	5293.78	7311.21	7293.6	9887.33	11436	6368.36	8816.94	131.475	438.398		0.0229531	-0.0595149	-0.301609	1.33798
Sum of Ions	598098	399651	554883	575745	763926	887423	525763	685528	87457.7	67557.3
Normalization
Lactic (261,233)	0.748999	0.74532	0.747091	0.748544	0.746017	0.748718	0.747956	0.748823	0.747315	0.745762
Lactic M+1	0.167257	0.171243	0.168075	0.168263	0.173248	0.168006	0.167219	0.167114	0.172935	0.173685
Lactic M+2	0.0711821	0.0701909	0.071658	0.0705248	0.067793	0.0703889	0.0727123	0.0712014	0.0782465	0.0740633
Lactic M+3	0.0125627	0.013246	0.0131761	0.0126681	0.0129428	0.0128868	0.0121126	0.0128615	0.00150329	0.00648927
Matrix correction
Lactic (261,233)	1.00214	0.997221	0.999591	1.00154	0.998154	1.00177	1.00075	1.00191	0.999891	0.997813
Lactic M+1	-0.00211905	0.00432448	-0.000448206	-0.000635946	0.00679603	-0.00103142	-0.00185543	-0.00225694	0.00598612	0.00745883
Lactic M+2	0.000217478	-0.00209217	0.00072083	-0.000938466	-0.00594661	-0.00105321	0.00233821	0.00029667	0.008057	0.00232607
Lactic M+3	0.00257705	0.00346852	0.0031617	0.00284599	0.00368276	0.0031988	0.00149162	0.0029755	-0.0147275	-0.006875
Correct for negative
Lactic (261,233)	1.00214	0.997221	0.999591	1.00154	0.998154	1.00177	1.00075	1.00191	0.999891	0.997813
Lactic M+1	0	0.00432448	0	0	0.00679603	0	0	0	0.00598612	0.00745883
Lactic M+2	0.000217478	0	0.00072083	0	0	0	0.00233821	0.00029667	0.008057	0.00232607
Lactic M+3	0.00257705	0.00346852	0.0031617	0.00284599	0.00368276	0.0031988	0.00149162	0.0029755	0	0
Sum for renormalization	1.00494	1.00501	1.00347	1.00438	1.00863	1.00497	1.00458	1.00518	1.01393	1.0076
Corrected & renormalized	1 MDA CD73pos, 1:9 dilution	1 MDA CD73pos, 1:14 dilution	2 MDA CD73pos, 1:14 dilution	3 MDA CD73pos, 1:14 dilution	4 MDA CD73neg, 1:14 dilution	5 MDA CD73neg, 1:9 dilution	5 MDA CD73neg, 1:14 dilution	6 MDA CD73neg, 1:14 dilution	blank	blank
Lactic (261,233)	0.997219	0.992246	0.996131	0.997166	0.989611	0.996817	0.996188	0.996745	0.98615	0.990289
Lactic M+1	0	0.00430291	0	0	0.00673787	0	0	0	0.00590386	0.00740259
Lactic M+2	0.00021641	0	0.000718336	0	0	0	0.00232755	0.000295141	0.00794628	0.00230853
Lactic M+3	0.00256438	0.00345122	0.00315076	0.00283357	0.00365124	0.00318299	0.00148482	0.00296016	0	0

[truncated: 43 more sheets: alanine, succinic, Fumaric, Malic, AKG, Citric, Isocitric, Cis-Aconitic, 2HG, Proline, Glutamic, Glutamine, Pyroglutamic, Aspartic, Asparagine SIM , glycine, Serine, Threonine, Glycerol, 3-PGlycerol …]
