# Supplementary figures and images for: The CD73 immune checkpoint promotes tumor cell metabolic fitness
Source: eLife journal article supplement (doi:10.7554/elife.84508), 2023-06-01

Fig1G

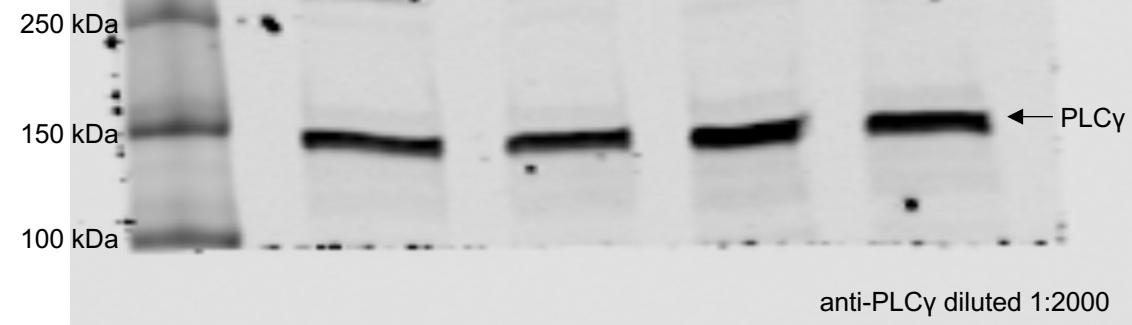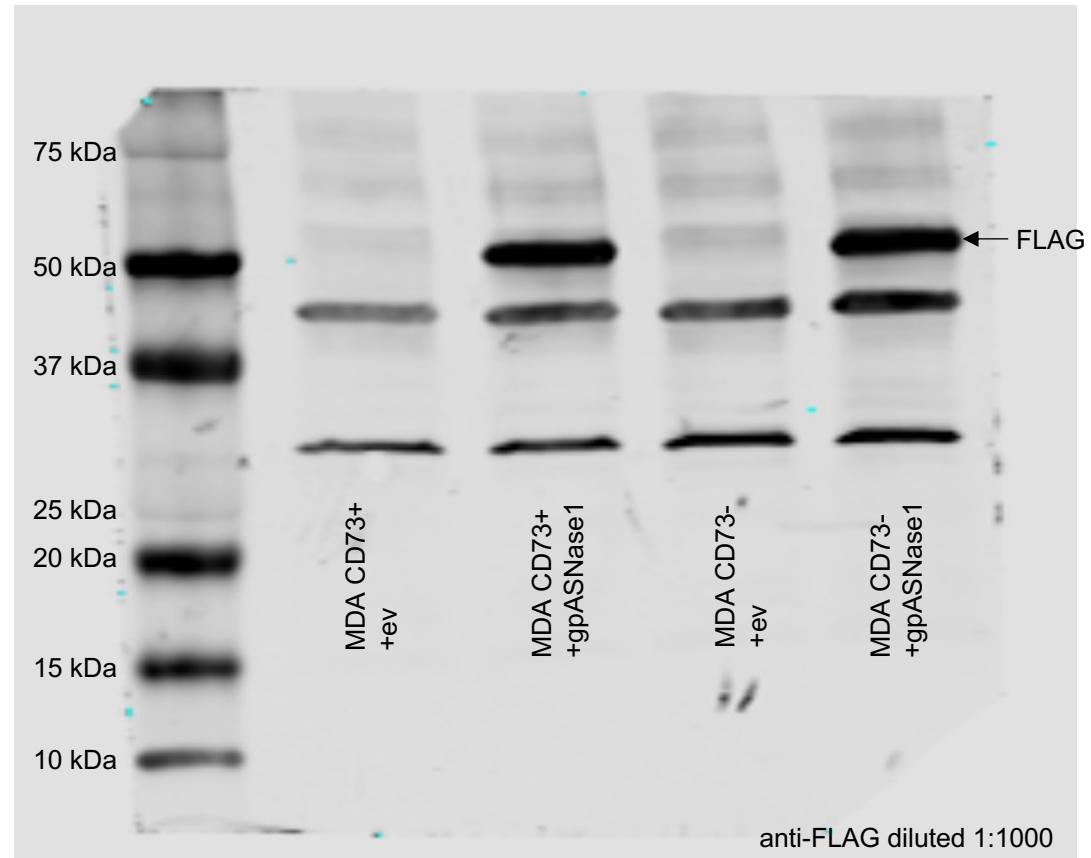

Supplement: fig1-data1 [file Fig1G_source-data.pdf › Fig1G_source-data.pdf]

Fig4A

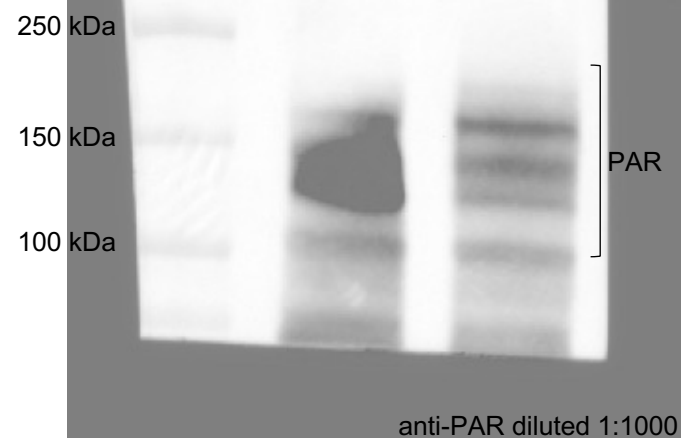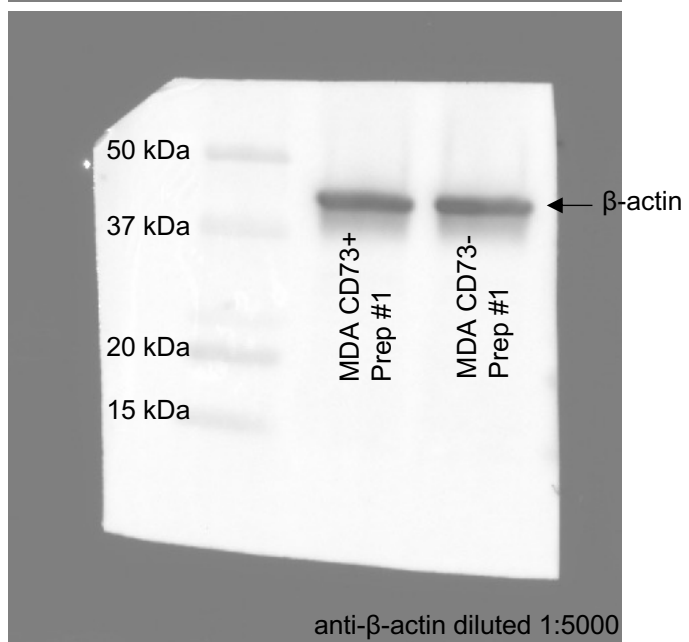

Fig4B

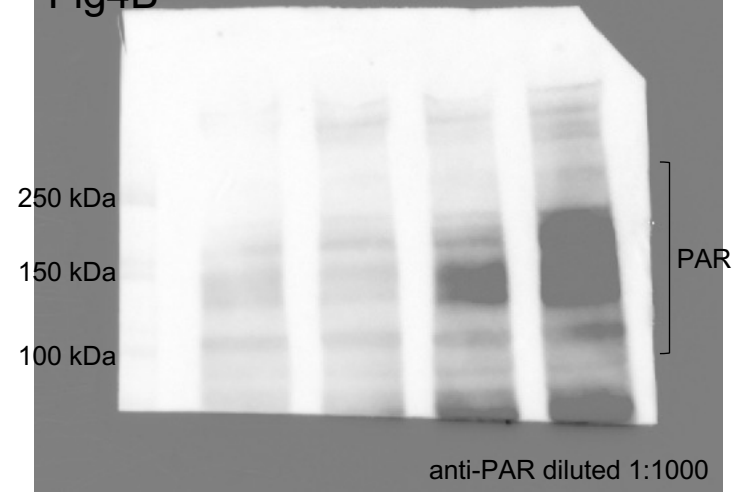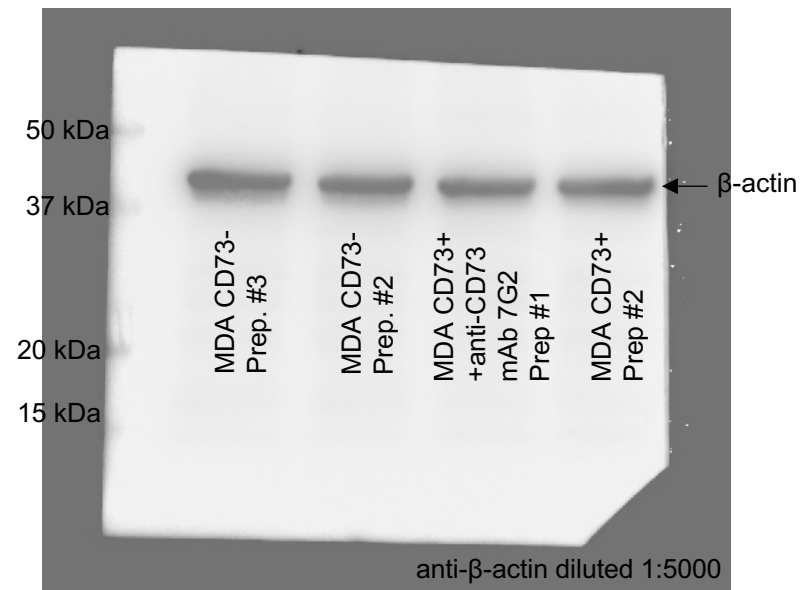

Fig4C

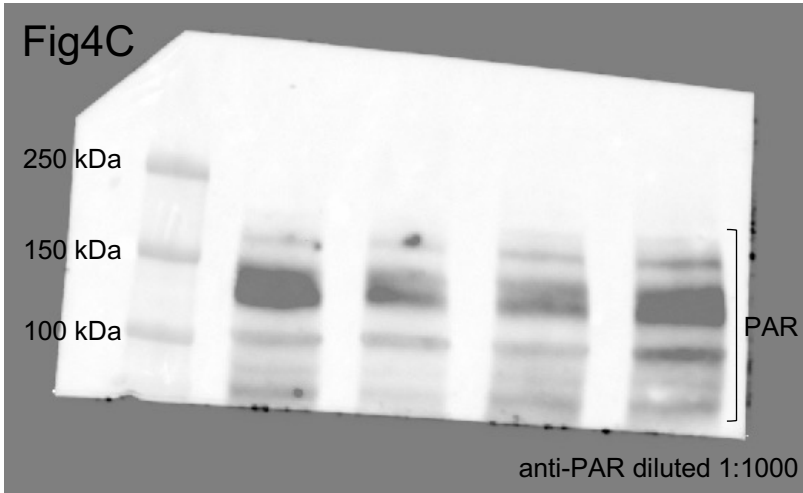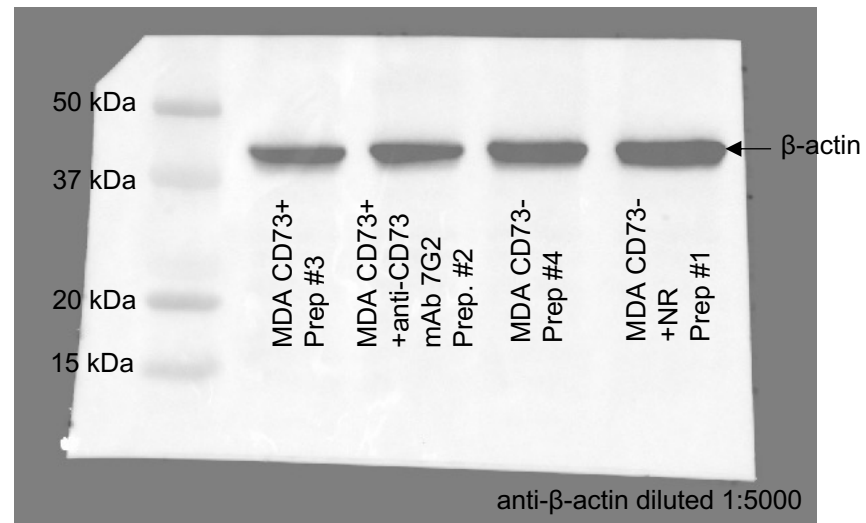

Supplement: fig4-data1 [file Fig4_source-data.pdf › Fig4_source-data.pdf]
